RESEARCH ARTICLE

# Coding SNPs analysis highlights genetic relationships and evolution pattern in eggplant complexes

Alberto Acquadro<sup>1</sup>, Lorenzo Barchi<sup>1</sup>, Pietro Gramazio<sup>2</sup>, Ezio Portis<sup>1</sup>, Santiago Vilanova<sup>2</sup>, Cinzia Comino<sup>1</sup>, Mariola Plazas<sup>3</sup>, Jaime Prohens<sup>2\*</sup>, Sergio Lanteri<sup>1\*</sup>

**1** University of Turin—DISAFA—Plant Genetics and Breeding, University of Turin, Largo Braccini 2, Grugliasco, Torino, Italy, **2** Instituto de Conservación y Mejora de la Agrodiversidad Valenciana, Universitat Politècnica de València, Camino de Vera 14, Valencia, Spain, **3** Instituto de Biología Molecular y Celular de Plantas, Consejo Superior de Investigaciones Científicas-Universitat Politècnica de València, Camino de Vera 14, Valencia, Spain

\* [sergio.lanteri@unito.it](mailto:sergio.lanteri@unito.it) (SL); [jprohens@btc.upv.es](mailto:jprohens@btc.upv.es) (JP)

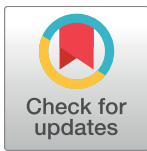

**OPEN ACCESS**

**Citation:** Acquadro A, Barchi L, Gramazio P, Portis E, Vilanova S, Comino C, et al. (2017) Coding SNPs analysis highlights genetic relationships and evolution pattern in eggplant complexes. PLoS ONE 12(7): e0180774. <https://doi.org/10.1371/journal.pone.0180774>

**Editor:** Mohar Singh, National Bureau of Plant Genetic Resources, Pusa India, INDIA

**Received:** February 14, 2017

**Accepted:** June 21, 2017

**Published:** July 7, 2017

**Copyright:** © 2017 Acquadro et al. This is an open access article distributed under the terms of the [Creative Commons Attribution License](https://creativecommons.org/licenses/by/4.0/), which permits unrestricted use, distribution, and reproduction in any medium, provided the original author and source are credited.

**Data Availability Statement:** All relevant data are within the paper and its Supporting Information files.

**Funding:** This work has been funded in part by European Union's Horizon 2020 Research and Innovation Programme under grant agreement No 677379 (G2P-SOL project: Linking genetic resources, genomes and phenotypes of Solanaceous crops) and by Spanish Ministerio de Economía, Industria y Competitividad and Fondo Europeo de Desarrollo Regional (grant AGL2015-

## Abstract

Brinjal (*Solanum melongena*), scarlet (*S. aethiopicum*) and gboma (*S. macrocarpon*) eggplants are three Old World domesticates. The genomic DNA of a collection of accessions belonging to the three cultivated species, along with a representation of various wild relatives, was characterized for the presence of single nucleotide polymorphisms (SNPs) using a genotype-by-sequencing approach. A total of 210 million useful reads were produced and were successfully aligned to the reference eggplant genome sequence. Out of the 75,399 polymorphic sites identified among the 76 entries in study, 12,859 were associated with coding sequence. A genetic relationships analysis, supported by the output of the *FastSTRUCTURE* software, identified four major sub-groups as present in the germplasm panel. The first of these clustered *S. aethiopicum* with its wild ancestor *S. anguivi*; the second, *S. melongena*, its wild progenitor *S. insanum*, and its relatives *S. incanum*, *S. lichtensteinii* and *S. linneanum*; the third, *S. macrocarpon* and its wild ancestor *S. dasyphyllum*; and the fourth, the New World species *S. sisymbriifolium*, *S. torvum* and *S. elaeagnifolium*. By applying a hierarchical *FastSTRUCTURE* analysis on partitioned data, it was also possible to resolve the ambiguous membership of the accessions of *S. campylacanthum*, *S. violaceum*, *S. lidii*, *S. vespertilio* and *S. tomentosum*, as well as to genetically differentiate the three species of New World Origin. A principal coordinates analysis performed both on the entire germplasm panel and also separately on the entries belonging to sub-groups revealed a clear separation among species, although not between each of the domesticates and their respective wild ancestors. There was no clear differentiation between either distinct cultivar groups or different geographical provenance. Adopting various approaches to analyze SNP variation provided support for interpretation of results. The genotyping-by-sequencing approach showed to be highly efficient for both quantifying genetic diversity and establishing genetic relationships among and within cultivated eggplants and their wild relatives. The relevance of these results to the evolution of eggplants, as well as to their genetic improvement, is discussed.

64755-R from MINECO/FEDER). Funding has also been received from the initiative "Adapting Agriculture to Climate Change: Collecting, Protecting and Preparing Crop Wild Relatives", which is supported by the Government of Norway. This last project is managed by the Global Crop Diversity Trust with the Millennium Seed Bank of the Royal Botanic Gardens, Kew and implemented in partnership with national and international gene banks and plant breeding institutes around the world. For further information see the project website: <http://www.cwrdiversity.org/>. Pietro Gramazio is grateful to Universitat Politècnica de València for a pre-doctoral (Programa FPI de la UPV-Subprograma 1/2013 call) contract. Mariola Plazas is grateful to Spanish Ministerio de Economía, Industria y Competitividad for a post-doctoral grant within the Santiago Grisolia Programme (FCJI-2015-24835). The funders had no role in study design, data collection and analysis, decision to publish, or preparation of the manuscript.

**Competing interests:** The authors have declared that no competing interests exist.

## Introduction

Eggplant, also known as brinjal eggplant or aubergine (*Solanum melongena* L., Solanaceae,  $2n = 2x = 24$ ), is cultivated worldwide and is one of the most important vegetable crops, being the second most important solanaceous crop grown for its fruit after tomato (*S. lycopersicum* L.) [1]. The bulk of eggplant production is concentrated in China, India, Iran, Egypt and Turkey, with Italy and Spain representing the most important European Union producers [1]. Because of its importance as a staple vegetable food in many countries from tropical and subtropical regions, eggplant is included with 34 other food crops in the Annex 1 of the International Treaty on Plant Genetic Resources for Food and Agriculture [2]. Eggplant berries are a source of dietary minerals as well as vitamins and other health-promoting metabolites such as anthocyanins and chlorogenic acid, with nutraceutical and anti-oxidant properties [3–6].

Brinjal eggplant selection and breeding over the years have been mainly focused on the improvement of fruit traits [7], such as size, weight, color, and shape [8,9], reduced prickliness, yield potential [10], and more recently organoleptic, nutritional and bioactive properties [11–14]. This has resulted in the development of a large number of eggplant varieties, whose fruit shape varies from flattened to elongated. However, like in many other domesticates, anthropogenic selection has resulted in a drastic reduction of the genetic variation across eggplant genome, due to both the genetic bottleneck resulting from the sampling process of a limited number of wild plants chosen for domestication [15] and the migration of a limited number of genotypes from the primary to the secondary centers of domestication [16]. The eggplant inter-fertile cultivated species as well as crop wild relatives (CWRs) are a source of variation for many traits of interest and represent an obvious target to aid eggplant improvement; however, to date, their potential use has largely remained unexploited [17].

Unlike tomato (*S. lycopersicum*), potato (*S. tuberosum* L.) and pepper (*Capsicum* spp.), eggplant is native to the Old World and was independently domesticated from *S. insanum* L. in the Indian subcontinent and in China [16,18], with a possible additional and independent center of domestication in the Philippines [19]. Besides *S. melongena*, two other eggplant species are commonly grown in sub-Saharan Africa [20], the scarlet eggplant (*S. aethiopicum* L.) and the gboma eggplant (*S. macrocarpon* L.). Both species can be inter-crossed with brinjal eggplant producing hybrids with intermediate fertility [21]. The three cultivated eggplants belong to the *Leptostemonum* clade and to a species-rich subclade composed exclusively of Old World taxa (the Old World clade sensu [22,23]) from Africa, Australia, and Asia (including Eurasia and the Middle East).

Scarlet eggplant (*S. aethiopicum* L.) is an important vegetable in Central and West Africa, but it is also cultivated in the Caribbean and Brazil as well as in some areas of South Italy [24]. It is a hypervariable species and includes hundreds of local varieties [25] clustered in four main cultivar groups: Aculeatum, Gilo, Kumba and Shum, which are completely inter-fertile [21]. The four cultivar groups are differently exploited, since Aculeatum is used as ornamental, Gilo for its fruits, Kumba for both fruits and leaves, while Shum for its leaves [25,26]. Gboma eggplant (*S. macrocarpon* L.) is less widespread in cultivation, although the species represents a major vegetable in some countries like Benin and in the rain forest regions of Coastal Africa and Congo River [27]. It is also a morphologically variable species and it is grown for its fruits, leaves or both [25,26]. The high variability within both scarlet and gboma eggplants has been recently confirmed by Plazas et al. [21], whom by applying conventional descriptors as well as the high-throughput Tomato Analyzer phenomics tool characterized a wide set of accessions of both cultivated species as well as from the scarlet eggplant wild ancestor *S. anguivi* Lam., *S. aethiopicum*-*S. anguivi* intermediate forms, and the gboma eggplant wild ancestor *S. dasyphyllum* Schumacher & Thonn. Each of the three cultivated eggplants together with their wild

ancestors and the closest wild relatives are commonly referred to as the brinjal, scarlet and gboma eggplant complexes [10,18,21,26].

Wild relatives of cultivated eggplants, which are well adapted to grow in a wide range of conditions, from desert to swampy areas and environments with wide ranges of temperatures, are a source of useful traits for eggplants breeding. Unfortunately the latter remain largely unexploited and a limited number of reports on the use of the variation available in the wild species has been reported [17,20,28] while, to our knowledge, no modern commercial varieties of eggplants carry introgression from wild species.

In brinjal eggplant and related species the delimitation of biologically meaningful genepools is challenging due to limited crossability data reported in literature [29], as well as to the extremely large number of potential genepool members. By taking into account both relatedness, as measured by phylogenetic analyses and available data on crossability, recently Syfert et al. [30] suggested the inclusion of one species (*S. insanum*) in the primary genepool (GP1), forty-eight species with which eggplant can be inter-crossed with varying degrees of difficulty in GP2, and three wild and weedy species native to the New World in GP3, i.e. *S. sisymbriifolium* Lam., *S. torvum* Sw. and *S. viarum* Dunal, with which only highly sterile hybrids can be obtained through embryo rescue or are not obtainable.

The great advances in next generation sequencing (NGS) technologies, with rapid increases in data volumes and quality combined with reducing costs, have provided breeders with a wide array of genomic tools which facilitate the characterization of germplasm collections and allow to gain a better understanding of how the genome contributes to the diversity detected at phenotypic level [31]. Single nucleotide polymorphisms (SNPs) represent the most frequent type of genetic polymorphism and have become the marker of choice for many applications in plant biology, conservation and breeding [32].

Here we report a genotype by sequencing (GBS) approach based on reducing genome complexity to detect SNPs polymorphisms in a set of seventy-six accessions of species belonging to the brinjal, gboma and scarlet eggplant complexes, which include taxa included in the *S. melongena* primary, secondary and tertiary genepools. Our main goal was to assess, using a high-throughput genotyping technique, the genetic relationships within and between the genepools of the brinjal eggplant (*S. melongena*) and the two other cultivated eggplants, namely the scarlet (*S. aethiopicum*) and gboma (*S. macrocarpon*) eggplants. Apart from cultivated accessions, we also included in the study accessions of close wild relatives of the three crops, as well more distant species from the tertiary genepool species. The information obtained will be of great relevance for clarifying the relationships among cultivated and wild eggplants and will be useful to breeders using wild species for eggplant breeding

## Material and methods

### Plant materials

A total of 76 accessions, including 16 entries of *S. melongena* from Asian and European origin, 30 of *S. aethiopicum* belonging to the four varietal groups (Aculeatum, Gilo, Kumba and Shum) plus intermediate forms between *S. aethiopicum* and *S. anguivi*, five of *S. macrocarpon*, and 25 accessions of 14 wild species were used for the present study (Table 1). Among the 16 entries of brinjal eggplant, two of them are doubled haploids (*S. melongena*\_10 and *S. melongena*\_12) obtained by anther culture [33]. Also, four brinjal eggplant entries come from two original sources (entries *S. melongena*\_1 and *S. melongena*\_2 from the original source MEL1; and accessions *S. melongena*\_6 and *S. melongena*\_7 from the original source MEL5) (Table 1). Among the wild relatives are included the putative ancestors of brinjal eggplant (*S. insanum*), scarlet eggplant (*S. anguivi*), and gboma eggplant (*S. dasyphyllum*) [34–36], as well as eight

**Table 1. Plant materials used including taxon, accession name, accession code used in the present work, country of origin and fruit shape and predominant colour.**

| Taxon and accession                                           | Code                       | Country of origin | Fruit shape <sup>a</sup> | Predominant fruit colour <sup>b</sup> |
|---------------------------------------------------------------|----------------------------|-------------------|--------------------------|---------------------------------------|
| <i>S. aethiopicum</i> L. gr. Aculeatum                        |                            |                   |                          |                                       |
| MM457                                                         | S. aethiopicum aculeatum_1 | Japan             | 1                        | 1.3                                   |
| UPV29803                                                      | S. aethiopicum aculeatum_2 | China             | 1                        | 1.2                                   |
| RNL0187                                                       | S. aethiopicum aculeatum_3 | Burkina Faso      | 1                        | 1.2                                   |
| MM1483                                                        | S. aethiopicum aculeatum_4 | Ghana             | 1                        | 1.3                                   |
| <i>S. aethiopicum</i> L. gr. Gilo                             |                            |                   |                          |                                       |
| BBS151A                                                       | S. aethiopicum gilo_1      | Ivory Coast       | 7                        | 1.1                                   |
| IVIA026                                                       | S. aethiopicum gilo_2      | Unknown           | 7                        | 1.2                                   |
| RARE_PLANTS_GILO                                              | S. aethiopicum gilo_3      | Unknown           | 3                        | 1.3                                   |
| RNL0252                                                       | S. aethiopicum gilo_4      | Ghana             | 3                        | 1.2                                   |
| UPV29014                                                      | S. aethiopicum gilo_5      | Unknown           | 5                        | 1.2                                   |
| RNL0395                                                       | S. aethiopicum gilo_6      | Liberia           | 3                        | 1.1                                   |
| RNL0288                                                       | S. aethiopicum gilo_7      | Ghana             | 5                        | 2                                     |
| BBS181A                                                       | S. aethiopicum gilo_8      | Ivory Coast       | 1                        | 1.3                                   |
| BBS147G                                                       | S. aethiopicum gilo_9      | Ivory Coast       | 1                        | 1.3                                   |
| BBS140B                                                       | S. aethiopicum gilo_10     | Ivory Coast       | 3                        | 1.2                                   |
| BBS159B                                                       | S. aethiopicum gilo_11     | Ivory Coast       | 5                        | 1.1                                   |
| BBS142A                                                       | S. aethiopicum gilo_12     | Ivory Coast       | 5                        | 1.2                                   |
| AN05                                                          | S. aethiopicum gilo_13     | Angola            | 3                        | 1.1                                   |
| <i>S. aethiopicum</i> L. gr. Kumba                            |                            |                   |                          |                                       |
| INRA_4                                                        | S. aethiopicum kumba_1     | Senegal           | 1                        | 1.1                                   |
| MM1207                                                        | S. aethiopicum kumba_2     | Mali              | 1                        | 1.1                                   |
| BBS111                                                        | S. aethiopicum kumba_3     | Ivory Coast       | 1                        | 2                                     |
| BBS110                                                        | S. aethiopicum kumba_4     | Ivory Coast       | 1                        | 1.1                                   |
| <i>S. aethiopicum</i> L. gr. Shum                             |                            |                   |                          |                                       |
| RNL0022                                                       | S. aethiopicum shum_1      | Benin             | 3                        | 1.3                                   |
| RNL_0340                                                      | S. aethiopicum shum_2      | Zimbabwe          | 1                        | 1.2                                   |
| <i>S. aethiopicum</i> L.- <i>S. anguivi</i> Lam. intermediate |                            |                   |                          |                                       |
| BBS116                                                        | S. aethiopicum-anguivi_1   | Ivory Coast       | 3                        | 1.3                                   |
| BBS192E                                                       | S. aethiopicum-anguivi_2   | Ivory Coast       | 5                        | 1.2                                   |
| BBS148D                                                       | S. aethiopicum-anguivi_3   | Ivory Coast       | 3                        | 1.1                                   |
| BBS131C                                                       | S. aethiopicum-anguivi_4   | Ivory Coast       | 3                        | 1.1                                   |
| BBS184                                                        | S. aethiopicum-anguivi_5   | Ivory Coast       | 3                        | 1.1                                   |
| BBS180A                                                       | S. aethiopicum-anguivi_6   | Ivory Coast       | 5                        | 1.1                                   |
| BBS114                                                        | S. aethiopicum-anguivi_7   | Ivory Coast       | 5                        | 1.2                                   |
| <i>S. anguivi</i> Lam.                                        |                            |                   |                          |                                       |
| ANG1                                                          | S. anguivi_1               | Ivory Coast       | 3                        | 1.1                                   |
| ANG2                                                          | S. anguivi_2               | Ivory Coast       | 3                        | 1.3                                   |
| <i>S. campylacanthum</i> Hochst. ex A. Rich                   |                            |                   |                          |                                       |
| CAM5                                                          | S. campylacanthum_1        | Tanzania          | 3                        | 1.2                                   |
| CAM6                                                          | S. campylacanthum_2        | Kenya             | 3                        | 1.2                                   |
| CAM8                                                          | S. campylacanthum_3        | Tanzania          | 3                        | 1.2                                   |
| <i>S. dasyphyllum</i> Schumach. & Thonn.                      |                            |                   |                          |                                       |
| DAS1                                                          | S. dasyphyllum_1           | Uganda            | 1                        | 1.2                                   |
| <i>S. elaeagnifolium</i> Cav.                                 |                            |                   |                          |                                       |
| ELE1                                                          | S. elaeagnifolium_1        | Senegal           | 3                        | 1.2                                   |

(Continued)

Table 1. (Continued)

| Taxon and accession                          | Code                 | Country of origin | Fruit shape <sup>a</sup> | Predominant fruit colour <sup>b</sup> |
|----------------------------------------------|----------------------|-------------------|--------------------------|---------------------------------------|
| ELE2                                         | S. elaeagnifolium_2  | Greece            | 3                        | 1.2                                   |
| <i>S. incanum</i> L.                         |                      |                   |                          |                                       |
| MM577                                        | S. incanum_1         | Israel            | 5                        | 1.2                                   |
| <i>S. insanum</i> L.                         |                      |                   |                          |                                       |
| INS1                                         | S. insanum_1         | Sri Lanka         | 5                        | 1.2                                   |
| INS2                                         | S. insanum_2         | Sri Lanka         | 3                        | 1.2                                   |
| INS3                                         | S. insanum_3         | Japan             | 3                        | 1.2                                   |
| <i>S. lichtensteinii</i> Willd.              |                      |                   |                          |                                       |
| LIC1                                         | S. lichtensteinii_1  | South Africa      | 3                        | 1.3                                   |
| LIC2                                         | S. lichtensteinii_2  | Iran              | 3                        | 1.1                                   |
| <i>S. lidii</i> Sunding                      |                      |                   |                          |                                       |
| LID1                                         | S. lidii_1           | Spain             | 3                        | 1.3                                   |
| LID2                                         | S. lidii_2           | Spain             | 3                        | 1.3                                   |
| <i>S. linnaeanum</i> Hepper & P.-M.L. Jaeger |                      |                   |                          |                                       |
| LIN1                                         | S. linnaeanum_1      | Spain             | 3                        | 1.3                                   |
| LIN3                                         | S. linnaeanum_2      | Tunisia           | 3                        | 1.3                                   |
| <i>S. macrocarpon</i> L.                     |                      |                   |                          |                                       |
| MM1558                                       | S. macrocarpon_1     | Malaysia          | 1                        | 2                                     |
| BBS168                                       | S. macrocarpon_2     | Ivory Coast       | 1                        | 2                                     |
| BBS117                                       | S. macrocarpon_3     | Ivory Coast       | 1                        | 1.3                                   |
| BBS171B                                      | S. macrocarpon_4     | Ivory Coast       | 1                        | 2                                     |
| BBS178                                       | S. macrocarpon_5     | Ivory Coast       | 5                        | 1.2                                   |
| <i>S. melongena</i> L.                       |                      |                   |                          |                                       |
| MEL1_2                                       | S. melongena_1       | Ivory Coast       | 5                        | 2                                     |
| MEL1_3                                       | S. melongena_2       | Ivory Coast       | 5                        | 2                                     |
| MEL2                                         | S. melongena_3       | Ivory Coast       | 5                        | 7                                     |
| MEL3                                         | S. melongena_4       | Ivory Coast       | 7                        | 1.2                                   |
| MEL4                                         | S. melongena_5       | Sri Lanka         | 3                        | 7                                     |
| MEL5_2                                       | S. melongena_6       | Sri Lanka         | 7                        | 7                                     |
| MEL5_5                                       | S. melongena_7       | Sri Lanka         | 7                        | 7                                     |
| MEL6                                         | S. melongena_8       | Sri Lanka         | 7                        | 7                                     |
| AN-S-26                                      | S. melongena_9       | Spain             | 5                        | 7                                     |
| DH_AN-S-26                                   | S. melongena_10      | Spain             | 5                        | 7                                     |
| MM1597                                       | S. melongena_11      | India             | 9                        | 1.2                                   |
| DH_ECAVI                                     | S. melongena_12      | Breeding line     | 7                        | 8                                     |
| H15                                          | S. melongena_13      | Spain             | 5                        | 7                                     |
| A0413                                        | S. melongena_14      | Unknown           | 1                        | 2                                     |
| ASI-S-1                                      | S. melongena_15      | China             | 1                        | 8                                     |
| IVIA371                                      | S. melongena_16      | Spain             | 5                        | 7                                     |
| <i>S. sisymbriifolium</i> Lam.               |                      |                   |                          |                                       |
| SIS1                                         | S. sisymbriifolium_1 | Unknown           | 3                        | 1.2                                   |
| SIS2                                         | S. sisymbriifolium_2 | Unknown           | 5                        | 1.3                                   |
| <i>S. tomentosum</i> L.                      |                      |                   |                          |                                       |
| TOM1                                         | S. tomentosum_1      | South Africa      | 3                        | 1.3                                   |
| <i>S. torvum</i> Sw.                         |                      |                   |                          |                                       |
| TOR2                                         | S. torvum_1          | Sri Lanka         | 3                        | 1.2                                   |
| TOR3                                         | S. torvum_2          | Unknown           | 3                        | 1.3                                   |

(Continued)

Table 1. (Continued)

| Taxon and accession         | Code                    | Country of origin | Fruit shape <sup>a</sup> | Predominant fruit colour <sup>b</sup> |
|-----------------------------|-------------------------|-------------------|--------------------------|---------------------------------------|
| <i>S. vespertilio</i> Aiton |                         |                   |                          |                                       |
| VES2                        | <i>S. vespertilio_1</i> | Spain             | 3                        | 1.3                                   |
| <i>S. violaceum</i> Ortega  |                         |                   |                          |                                       |
| VIO1                        | <i>S. violaceum_1</i>   | Sri Lanka         | 3                        | 1.2                                   |

<sup>a</sup>Fruit shape according to the following scale: 1 = broader than long; 3 = as long as broad; 5 = slightly longer than broad; 7 = twice as long as broad; 8 = three times as long as broad; 9 = several times as long as broad.

<sup>b</sup>Fruit predominant colour when the fruit is physiologically immature according to the following categories, in which the green colour (1) has been subdivided into three subcategories: 1.1 = clear green; 1.2 = intermediate green; 1.3 = dark green; 2 = milk white; 3 = deep yellow; 4 = fire red; 5 = scarlet red; 6 = lilac grey; 7 = purple; 8 = purple black; 9 = black.

<https://doi.org/10.1371/journal.pone.0180774.t001>

other wild species from Old World origin (*S. campylacanthum* Hochst. ex A. Rich, *S. incanum* L., *S. lichtensteinii* Willd., *S. lidii* Sunding, *S. linmaeanum* Hepper & P.-M.L. Jaeger, *S. tomentosum* L., *S. vespertilio* Aiton, and *S. violaceum* Ortega), and three native to the New World (*S. elaeagnifolium* Cav., *S. sisymbriifolium*, and *S. torvum*) [30,37]. All these materials are conserved in the germplasm collection maintained at Universitat Politècnica de València (Valencia, Spain).

### Library construction and sequencing

DNA was extracted following a modified CTAB method [38] as indicated elsewhere [39]. Library construction (11/2015) was performed as proposed in Peterson et al. [40] and modified as in Acquadro et al. [41], by using a HindIII-MseI enzyme combination and adding a final biotin/streptavidin-coated beads based purification step. Quality, quantity and reproducibility of libraries were assessed on a Bioanalyzer instrument (DNA High Sensitivity chip) as well as qPCR. On the basis of the quantitation, DNA libraries were pooled and sequenced on Illumina HiSeq 2500 platform (Illumina Inc., San Diego, CA, USA), following the manufacturer protocol using 100SE chemistry.

### Sequence analysis

Raw reads were analyzed with Scythe (<https://github.com/vsbuffalo/scythe>) for filtering out contaminant substrings and Sickle (<https://github.com/najoshi/sickle>), which allows to remove reads with poor quality ends (Q<30). Illumina reads were de-multiplexed on the basis of the Illumina TruSeq index. Alignment to the reference eggplant genome [42,43] was carried out using BWA aligner [44] (i.e., mem command) with default parameters and avoiding multiple-mapping reads. SNP mining was conducted by adopting a Samtools-based pipeline [45]. Homozygous/heterozygous SNP/Indel calls were considered only with phred-scaled genotype likelihood equal zero. A catalog of candidate high quality SNPs was produced. Relationships among the genotypes were computed using: i) whole genome, and ii) coding (within exons) SNP/indel datasets. The proportion of heterozygous SNPs for each genotype was estimated by the ratio of total number of heterozygous SNPs and all the detected SNPs (excluding missing SNPs) as well as the ratio of the number of heterozygous SNPs in coding regions and all the detected SNPs in coding regions.

### Genetic relationships analysis and population structure

SNP data were coded according to the number of occurring polymorphisms, being assigned a 0 if they showed the homozygous reference type, a 1 if the variant occurred in one



chromosome and a 2 if the variant was present in both chromosomes. Genetic similarities between pairs of entries were quantified by the Dice similarity index [46] as  $2m^+/(2m^+ + m^-)$ , where  $m^+$  is the number of matches (1–1 and 2–2) and  $m^-$  is the number of mismatches (0–1, 0–2 and 1–2). Genetic relationships were described by using both the unweighted pair-group arithmetic mean (UPGMA) method with 1,000 bootstraps, and principal coordinate analysis (PCoA) by means of Past 3.14 software [47]. A co-phenetic matrix was also produced using the hierarchical cluster system, by means of the COPH (cophenetic values) routine, and correlated with the original distance matrix, in order to test for associations between clusters and the similarity matrix.

*FastSTRUCTURE* [48] was used to estimate the number of sub-populations in the panel, applying the admixture model for the ancestry of individuals and correlated allele frequencies. A hierarchical *FastSTRUCTURE* analysis [49] was also applied on accessions which clustered in sub-group 1 and subgroup 4 following UPGMA analysis as well as on the set of all the remaining. The program was run with default setting using simple prior to obtain a reasonable range of values for the number of populations (K), *FastSTRUCTURE* was executed for multiple values of K (K = 1–9). The script chooseK.py [48] was then used to infer the most likely number of populations.

## Results and discussion

### Sequencing and SNPs identification

A total of 225 million single reads were produced. About 94% of raw reads contained the expected restriction site overhang, along with discriminating inline barcodes. The average number of successfully de-multiplexed reads per sample was 2.7 M, with a standard deviation of 1.5 M (S1 Fig). Sequences were trimmed and quality cleaned to 210 million of useful reads (6.2% discarded). The latter were then aligned to the recently produced reference eggplant genome [42,43] and close to 100% of reads were successfully mapped to single regions (no multiple mapping was permitted). Mapped sequences showed an extensive coverage alongside the 12 chromosomes (data not shown).

In all, 75,399 polymorphic sites were identified among the 76 lines in study. Overall, all the *S. melongena* accessions, together with the three *S. insanum* accessions, showed a reduced level of polymorphism (on average 2.47 and 4.75% respectively) when aligned to the reference genome. On the other hand the frequency of polymorphic SNPs ranged from 10.62 to 24.32% in the other entries (S1 Table).

*Solanum melongena* is a largely autogamous species [20], thus its low level of heterozygosity (on average 1.66%) is coherent with the expectation that germplasm accessions and non-hybrid varieties should be highly homozygous (Fig 1, S1 Table). Interestingly, the two *S. melongena* varieties (*S. melongena\_10*, *S. melongena\_12*, Fig 1, S1 Table), which are the result of diploidization of haploid plants obtained through anther culture, displayed some heterozygosity (<0.5%). This might be due to somaclonal variation, which is manifested as cytological abnormalities, sequence change, and gene activation and silencing which occur through the 'in vitro' culture process and that provides evidence that DNA modifications occur more frequently in 'in vitro' cultivated than in seed-grown plants [50]. However, it might be also a consequence of SNPs mapping on paralog genes since, similarly to tomato, potato and pepper, also eggplant the genome carries signs of the "T" triplication occurred during Solanaceae evolution [42], or being the results of some mapping artifacts. This would suggest that the heterozygosity detected in the rest of *S. melongena* accessions would be overestimated by almost one third.

The two other cultivated eggplant species (i.e., *S. aethiopicum* and *S. macrocarpon*) showed, on average, higher heterozygosity than *S. melongena*, ranging from 4.52 to 9.53% (Fig 1, S1 Table). This might be a consequence of their higher allogamy and the more limited breeding

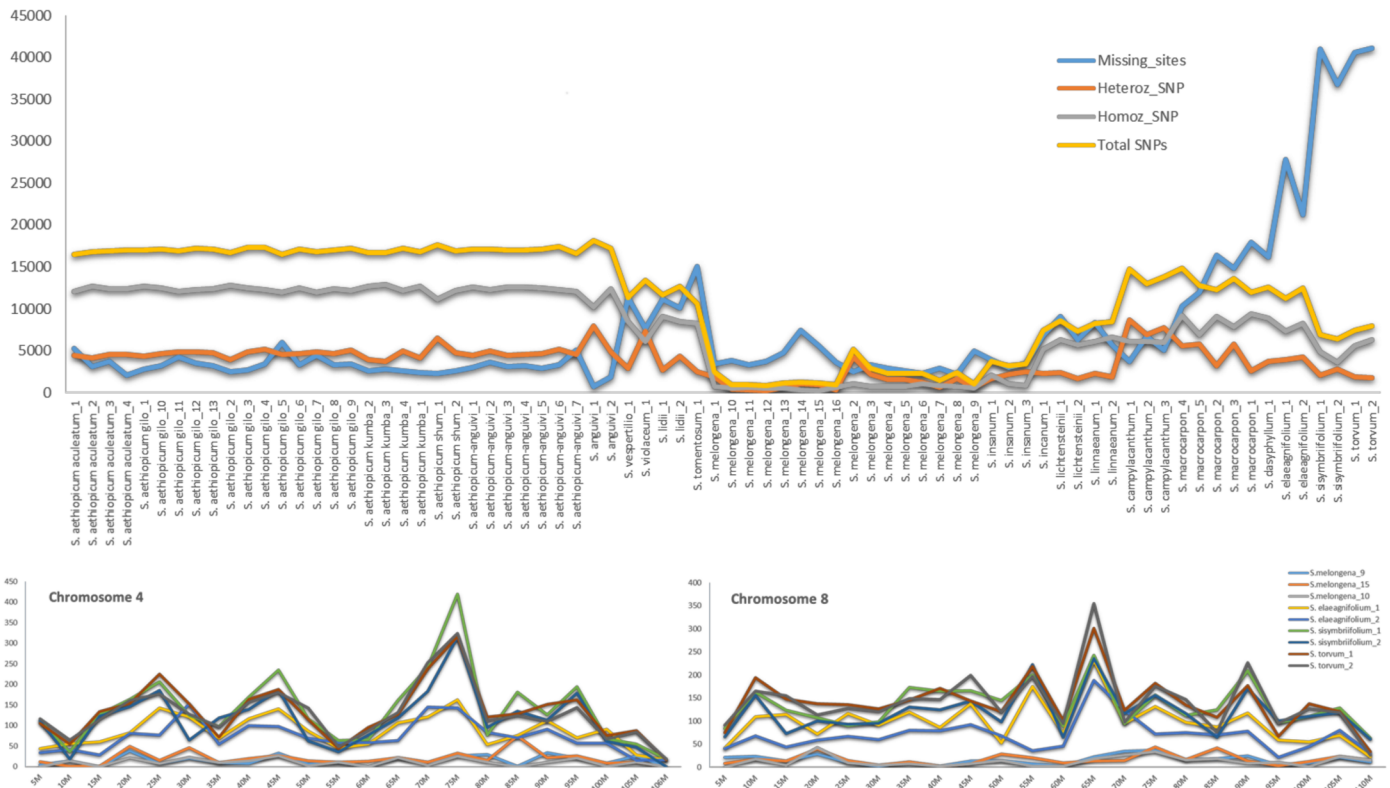

**Fig 1. SNP numbers and distribution:** A) Plot of the number of SNPs (total, homozygous and heterozygous) and missing sites observed within the collection of 76 *Solanum* accessions; B) The distribution of missing sites along two eggplant chromosomes (i.e.: chr4 and chr8). The trend lines track missing sites in three *Solanum melongena* and six accessions of American origin (*S. elaeagnifolium*, *S. sisymbriifolium* and *S. torvum*).

<https://doi.org/10.1371/journal.pone.0180774.g001>

efforts for stabilizing phenotypic and yield-related traits. Low heterozygosity was also observed in the wild *S. insanum*, *S. lichtensteinii* and *S. linnaeanum* (< 3.5%), while higher values, over 10%, were observed in the wild species *S. campylacanthum*, *S. anguivi* and *S. violaceum*.

Some missing data were observed in *S. melongena* and *S. aethiopicum* (ranging from 2.71% to 9.87%), some accessions showed a medium-high level of missing data (e.g., *S. macrocarpon* 19% on average), while others showed a surprisingly high number of missing data (up to 54.5%, 54.43 and 36.88, in *Solanum torvum*, *S. sisymbriifolium* and *S. elaeagnifolium*, respectively). This might be explained by the fact that these latter species are native to the New World [30,37] and in consequence have a more distant common ancestor, and greater evolutionary divergence. Missing data were distributed on the different eggplant chromosomes; however, by adopting a five million bases sliding window analysis, some hot spot regions were highlighted (Fig 1). The filtering of the whole SNP dataset for the sites present in CDS regions granted 12,859 SNPs. The latter were used for all the subsequent analyses, since the relative number of missing data was lower in the coding dataset (3% on average) than in the whole dataset (10% on average, Fig 1, S1 Table). As an example the percentage of missing data of South American accessions (*S. elaeagnifolium*, *S. sisymbriifolium* and *S. torvum*—S1 Table) was lowered from about 46.1% to 15.1%, thereby increasing the resolution power of our analyses.

### Genetic relationships analysis and population structure

The UPGMA-based dendrogram and the output of *FastSTRUCTURE* [48] analysis (Fig 2) show the genetic relationships between the 76 accessions. Both, as well as the K analysis (Fig 2



box), suggest a population structure comprising four sub-groups. Each entry was fingerprinted and the co-phenetic correlation coefficient ( $r$ -value) between the Dice data matrix and the co-phenetic matrix was 0.978, highlighting a very good fit between the dendrogram clusters and the similarity matrices from which they were derived, indicating that the UPGMA method is suitable for the interpretation of our data. The fact that the sister entries *S. melongena\_1* and *S. melongena\_2*, which are derivatives from the original source MEL1 cluster together in the dendrogram, and the same occurs for accessions *S. melongena\_6* and *S. melongena\_7*, which derive from MEL5 provide a confirmation that the analysis is congruent.

According to the level of membership provided by *FastSTRUCTURE* [48], sub-group 1 (blue) includes all the accessions of scarlet eggplant (*S. aethiopicum*) and *S. anguivi*, which on the basis of previous studies has been reported to be its wild ancestor [30,34,51]. Sub-group 2 (orange) includes members of the brinjal eggplant complex [52,53], among which the most genetically related accessions of *S. melongena* and its wild progenitor *S. insanum*, the accession of *S. incanum*, and the two of both *S. lichtensteinii* and *S. linnaeanum*. Sub-group 3 (yellow) includes the five accessions of gboma eggplant (*S. macrocarpon*) and the one *S. dasyphyllum*, which is its wild progenitor [30,35]. Sub-group 4 (grey) includes the accessions of the New World species, which form part of the tertiary genepool of brinjal eggplant [30]. Finally, the remaining accessions of *S. campylacanthum*, *S. violaceum*, *S. lidii*, *S. vespertilio* and *S. tomentosum* had ambiguous membership and were thus classified as admixed, as their level of membership to a single group was lower than 70% (Fig 2). With the goal to provide insight into the complex relationships of the germplasm used, and to detect additional sub-population structure, a hierarchical *FastSTRUCTURE* analysis was applied by running *STRUCTURE* on partitioned data, i.e. on accessions which clustered in sub-group 1 and sub-group 4 following UPGMA analysis, as well as on the remaining materials (S2 Fig). The hierarchical *FastSTRUCTURE* analysis for the scarlet eggplant complex revealed that the optimal number of populations was obtained at  $K = 2$ , and that the accessions of *S. aethiopicum* and *S. anguivi*, included in the UPGMA subgroup 1, share a common genepool. For the brinjal eggplant and gboma eggplant complexes group, the hierarchical *FastSTRUCTURE* analysis suggests that four populations are present. In this set of accessions  $K = 2$  separates the brinjal eggplant *S. melongena* and its close relatives *S. insanum*, *S. incanum*, *S. lichtensteinii* and *S. linnaeanum* [18] from the gboma eggplant *S. macrocarpon* and its wild ancestor *S. dasyphyllum* [35] together with the Canary Islands endemisms *S. lidii* and *S. vespertilio* and the related South African *S. tomentosum* [23,54,55], while *S. campylacanthum* and *S. violaceum* appear as an admixture (S2 Fig). At  $K = 3$  the *S. lidii*, *S. vespertilio*, *S. tomentosum* and *S. violaceum* are separated from the gboma eggplant. Finally, at the optimal  $K = 4$ , *S. campylacanthum* accessions group separately, while *S. incanum*, *S. lichtensteinii* and *S. linnaeanum* appear as an admixture of *S. melongena/S. insanum* and *S. campylacanthum* (S2 Fig). This might be a consequence of gene flow among them or the result of the recent speciation from a common ancestor or both. These species are phylogenetically closely related but at present are distributed in different geographical areas [18]; this suggests that presumably they evolved from a common ancestor for adaptation to different niches, which might difficult gene flow. The hierarchical *FastSTRUCTURE* analysis of the New World species recognized at  $K = 2$  two populations, one of which included *S. elaeagnifolium* while the other both *S. sysimbriifolium* and *S. torvum*. However, at the optimal  $K = 3$ , the latter was further splitted in two genetically differentiated genepools, each including one of the two species.

## PCoA analyses

The whole data set was also subjected to PCoA analysis (Fig 3) which, on the whole, confirmed the grouping of genotypes based on UPGMA and *FastSTRUCTURE* [48] clustering. Because a

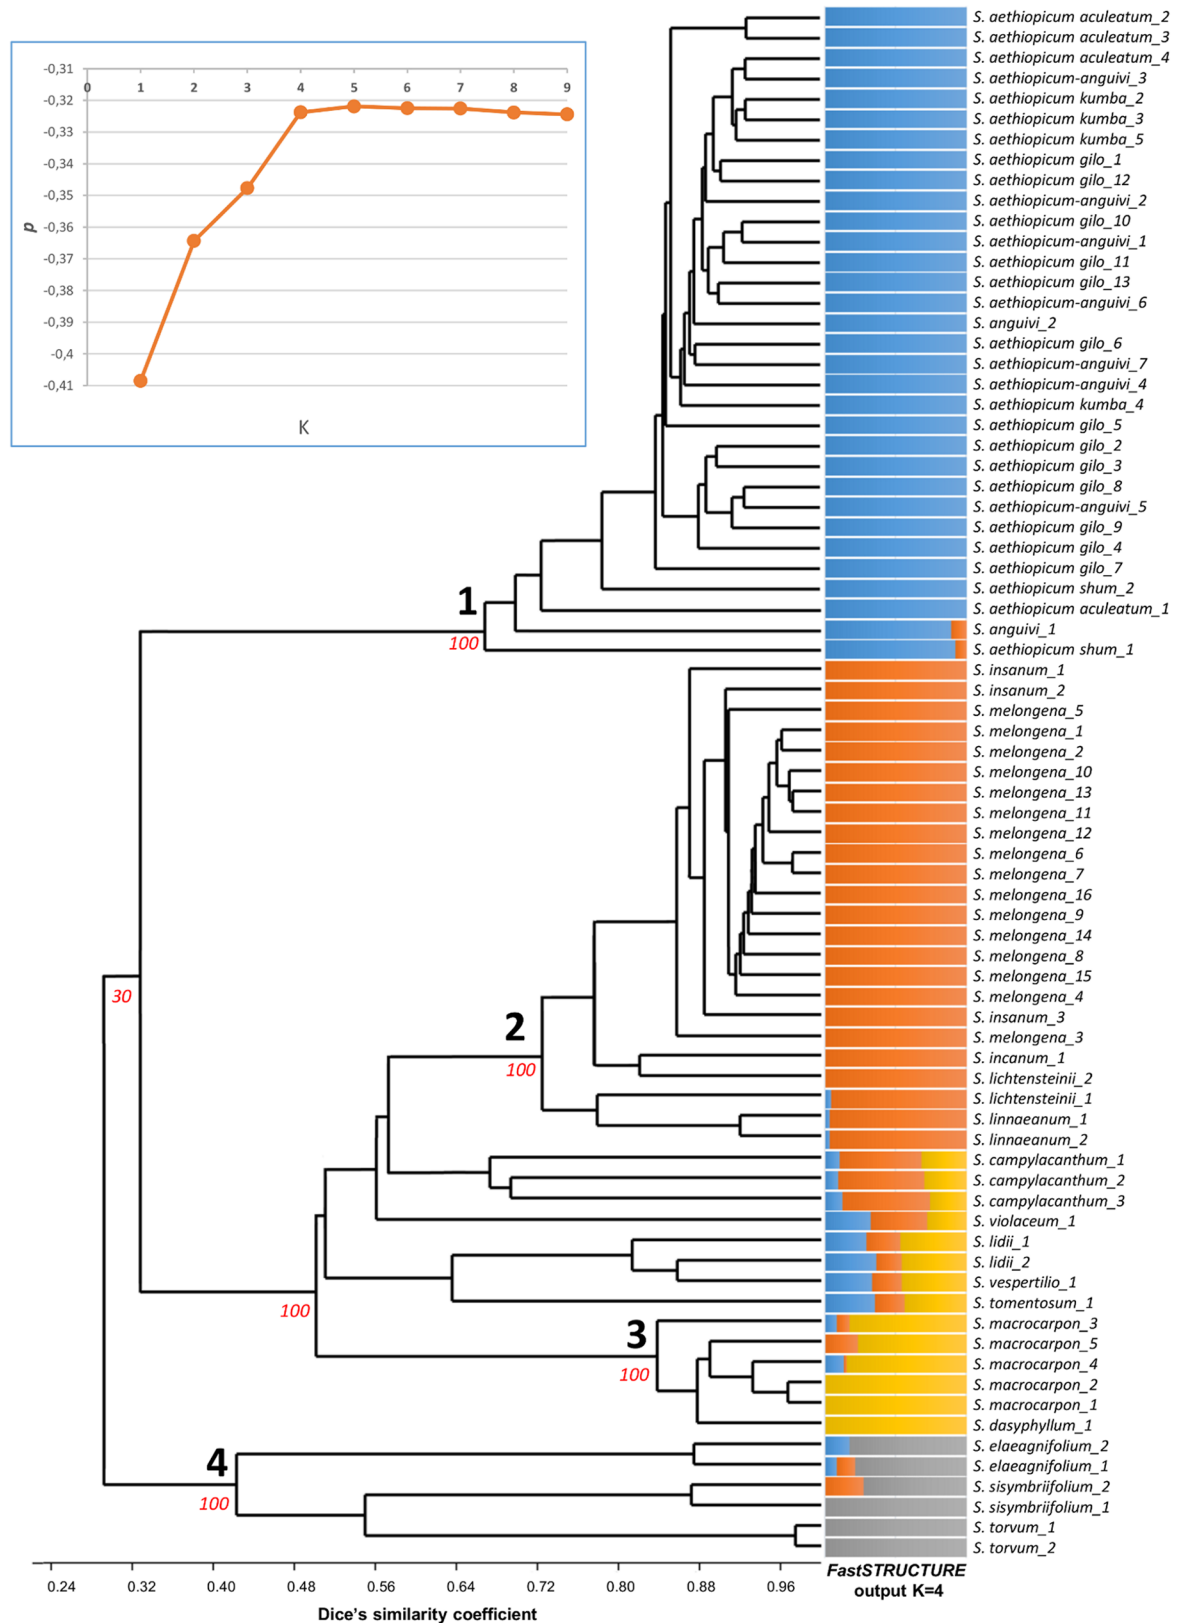

**Fig 2. The genetic architecture of the full germplasm panel: Consensus UPGMA dendrogram and *FastSTRUCTURE* output at *K* = 4.** Bootstrap values (%) for the main nodes are reported in red. Each entry is represented by a vertical line

representing sub-group 1 (blue) sub-group 2 (orange), sub-group 3 (yellow) and sub-group 4 (grey). The box reports the Probabilities (p) plots derived from the *FastSTRUCTURE* analysis of genotypic data with K values from 1 to 9.

<https://doi.org/10.1371/journal.pone.0180774.g002>

limited number of samples of each of the wild relatives was included in our study, the PCoA analysis did not allow to highlight the within-species diversity as it did in the cultivated species; however, it made possible some additional inferences. The first two axes explained 71.4% of the genetic variation. The first axis, explaining 57.6% of the genetic variation, clearly separated cultivated scarlet eggplant *S. aethiopicum* and its wild ancestor *S. anguivi* from all the other accessions, with no evident separate clustering of the two species. The latter are fully inter-fertile [34,51] and the identification of intermediate forms [27,29] suggests occurrence of genetic flow between them.

The second axis, explaining 13.8% of the genetic variation, clearly split the entries of *S. sisymbriifolium*, *S. torvum* and *S. elaeagnifolium*, which clustered in the previously described group 4, from the ones of sub-clusters 2 and 3 as well as the entries classified as admixed, i.e. brinjal and gboma eggplants, their respective progenitors *S. insanum* and *S. dasyphyllum* together with other Old World wild species, as well as the entries classified as admixed.

Both *S. sisymbriifolium* and *S. torvum* are native of South and Central America and, together with *S. viarum*, were classified in GP3 by Syfert et al. [30]. They have been also reported to be, within subgenus *Leptostemonum* (Dun.) Bitt., phylogenetically far away from the cultivated eggplants and the other Old World species [23,30,54,55]. *Solanum elaeagnifolium* is also a New World species [37] which was not included in the study of Syfert et al. [30], and whose origin is attributable to GP3 on the basis of the present results.

Both *S. sisymbriifolium* and *S. torvum* are of interest for eggplant breeding, as they are tolerant or resistant to many diseases [20]. Their high phylogenetic distance to cultivated eggplants is confirmed by the many ineffective attempts to hybridize them with *S. melongena* [29,56–58]. No sexual hybrids have ever been reported between *S. melongena* and *S. sisymbriifolium*, while interspecific hybrids obtained through embryo rescue of the cross *S. melongena* x *S. torvum* were highly sterile and no backcrosses have been reported to date [17]. Furthermore, although tetraploid somatic hybrids between either *S. sisymbriifolium* or *S. torvum* with *S. melongena* were obtained, they did not produce sexual offspring [59,60].

On the basis of PCoA analysis, the cultivated species which appears genetically closer to the cultivated eggplant is gboma eggplant (*S. macrocarpon*), clustering together with *S. dasyphyllum*, which has been reported by many authors to be its wild ancestor [23,35,52,54,61] (Fig 3). This seems to indicate that gboma eggplant, might be genetically closer to *S. melongena* than the cultivated scarlet eggplant (*S. aethiopicum*), which is included in section *Oliganthes* (Dunn.) Bit. [34,62]. However contrasting results have been reported in literature. Based on chloroplast DNA RFLPs [63], ISSRs [64], AFLPs and nrITS sequences [19] it was previously reported that *S. aethiopicum* is closer to *S. melongena* than *S. macrocarpon*; otherwise Sakata and Lester [65], in a study based on chloroplast DNA RFLPs, and Vorontosva et al. [23] using ITS, waxy and trnT-F regions sequences obtained opposite results. Interestingly, Furini and Wunder [66] using AFLPs as well as Levin et al. [54], Weese and Bohs [53] and Särkinen et al. [55] using several nuclear and plastid DNA sequences found that *S. aethiopicum* and *S. macrocarpon* were phylogenetically closer among them than to *S. melongena*. Studies based on the species inter-fertility highlighted that interspecific hybrids between *S. melongena* and *S. aethiopicum* as well as backcrosses could be easily obtained [17,67,68]; on the other hand, although hybrids between *S. melongena* and *S. macrocarpon* were obtained [56,67,69], in most cases they were high sterile and only the backcross of a tetraploid hybrid between the two species with *S. melongena* was successful [69]. The difficulty in obtaining the hybrids between these two

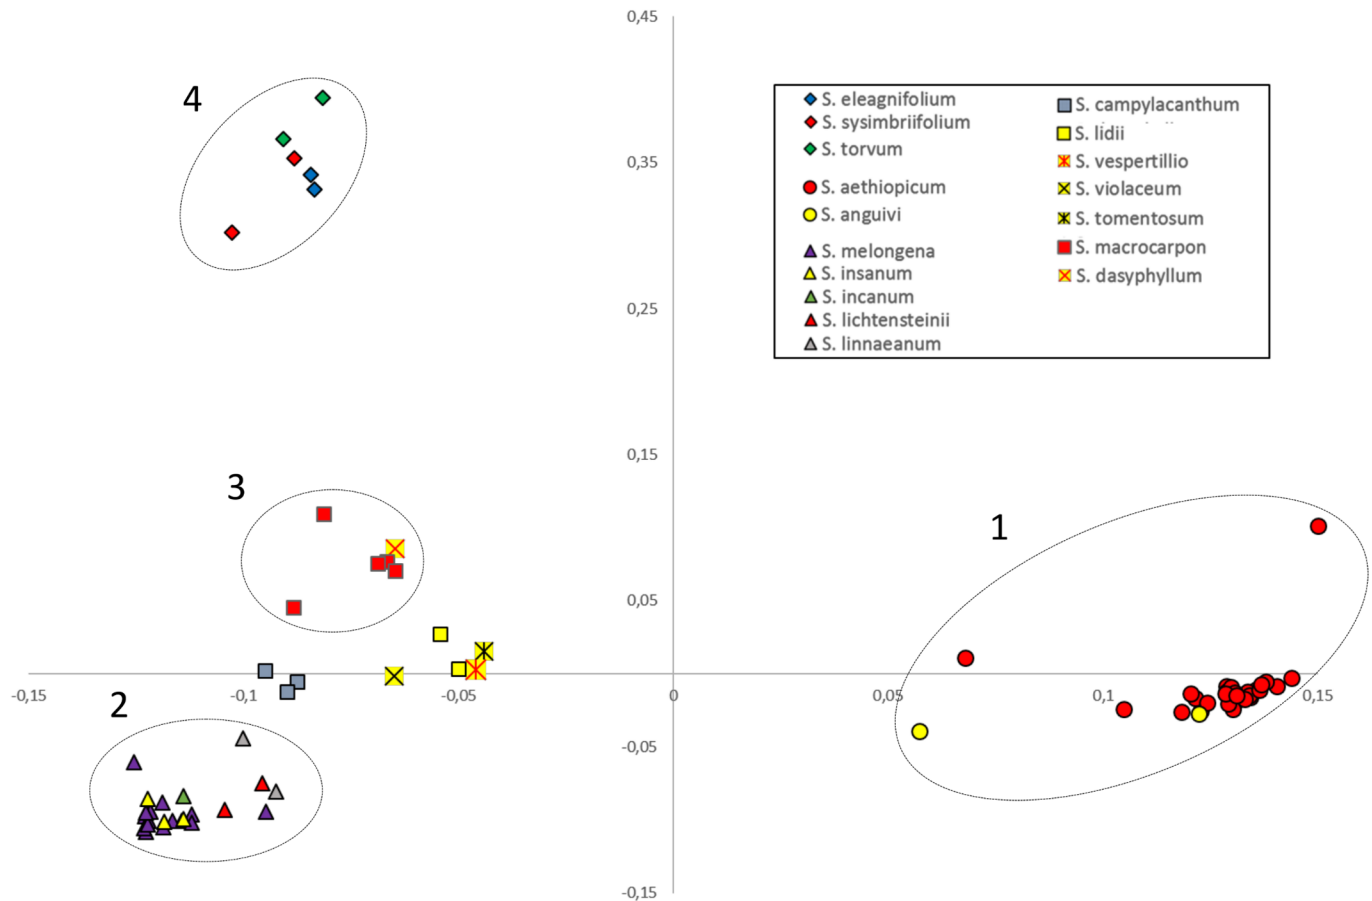

**Fig 3. The genetic architecture of the full germplasm panel of 76 *Solanum* accessions.** PCoA visualization of the genetic relationships within the full set of accessions.

<https://doi.org/10.1371/journal.pone.0180774.g003>

species, despite being phylogenetically close [23,65], might be caused by some chromosomal rearrangement or other hybridization barriers. At last, Kouassi et al. [58] reported that the backcrosses towards *S. melongena* of the hybrid between *S. dasyphyllum* (wild ancestor of *S. macrocarpon*) and *S. melongena* was successful. A clarification is provided by our data obtained from *FastSTRUCTURE* analysis (Fig 2) which highlights that the three cultivated species belong to clearly separate groups, suggesting that *S. macrocarpon* should be excluded from section *Melongena* (Mill.) as proposed by Sakata et al. [63].

PCoA analysis also showed that *S. campylacanthum*, *S. incanum*, *S. insanum*, *S. lichtensteinii* and *S. linnaeanum*, which form part of the “brinjal eggplant” complex [52,53], cluster in proximity with eggplant (Fig 3). Among them, *S. campylacanthum* appears to be the most genetically differentiated from the others. This is in agreement with previous AFLP, nuclear and chloroplast DNA sequence results [23,53,61]. Indeed, interspecific hybrids were obtained between *S. campylacanthum* and *S. melongena*, but the number of seeded fruits and seeds per fruit was lower in respect to the ones obtained following crosses with other species within the “common eggplant” complex [52,58,70]. *Solanum linnaeanum* and the accession of *S. lichtensteinii* cluster together and close to *S. melongena*. This result confirms that the two species are genetically related [23,53] and supports the hypothesis that *S. linnaeanum* and *S. lichtensteinii* are of South African origin and share a common ancestor, although the former grows in several tropical and subtropical areas of the world [18,23].

*Solanum linnaeanum* and *S. lichtensteinii* produce hybrids with moderate or high fertility when crossed with eggplant [18], which can be also backcrossed with relative ease [17,19,23,58,28]. However our data show that they are genetically more distant from *S. melongena* than *S. incanum* or *S. insanum* [19,23,53,65,66]. *Solanum incanum* was suggested to be eggplant's pre-domestication ancestor and is being used in eggplant breeding programs as a source of variation for phenolics content and resistance to drought [18]. Recent morphological and molecular work has shown that species-level differences exist between *S. incanum* and *S. melongena* and, on the basis of new evidence, *S. insanum* is considered the eggplant wild progenitor [36]. The two species are also fully inter-fertile and their hybrid produce many fruits and seeds [29]. It is also not surprising that, since frequent genetic flow occurs between both species in the indo-birmanian region [71,72], in our PCoA analysis the *S. insanum* accessions appear intermingled with the ones of *S. melongena*.

Our data show that the three species *S. lidii*, *S. tomentosum*, *S. vespertilio* cluster into proximity to each other and *S. violaceum* a little more apart (Fig 3). *Solanum lidii* and *S. vespertilio* are endemic to the Canary Islands (Spain) and are genetically similar sister species, which were found to cluster together in previous molecular studies [23,54,55,73,74]. In several molecular studies *S. tomentosum* was also found to cluster close to *S. lidii* and *S. vespertilio* [23,54,55,73], thus our results confirm that the three species are close relatives. *Solanum violaceum* clusters with these three taxa in both the *FastSTRUCTURE* and PCoA analyses in spite of having a native distribution in India and Southeast Asia [19].

### Within-groups PCoA analyses

In order to gain a better landscape of the genetic relationships among the species in study, PCoA analyses were also separately performed on entries clustering in the sub-groups 1, 2 and 4, following *FastSTRUCTURE* [48] analysis (Fig 4A, 4B and 4C). The separate PCoA of entries grouped in sub-group 1 (Fig 4A) confirmed that the different *S. aethiopicum* varietal types are partially intermingled and show a high within varietal type genetic diversity; furthermore, the absence of an evident genetic differentiation with their wild ancestor *S. anguivi* was confirmed. As observed by Sunseri et al. [24] in a molecular characterization based on AFLP and SSR markers, the different cultivar groups of *S. aethiopicum* were intermingled in the cluster analysis. The four cultivar groups (Aculeatum, Gilo, Kumba, and Shum) are distinguished by simple morphological traits, like fruit size and shape, fruit bitterness, and the presence or absence of prickles and star leaf hairs [26,34], which allow the differentiation among cultivars based on morphological characterizations [21]. However several of these traits, like prickliness and presence/absence of star leaf hair, seem to have a simple genetic basis in scarlet eggplant [51] while, as occurs in common eggplant [75,76], other traits (fruit size and shape) are under control of a few major genes. The genetic flow occurring between different groups, as a result of spontaneous or artificial hybridization, may thus result in a lack of (or reduced) genetic differentiation. Indeed, in a previous study [26], it was reported that the Aculeatum group seems to have been derived from hybridization between *S. aethiopicum* group Kumba and *S. anguivi*. On the whole, the varietal groups that showed the highest genetic differentiation were Aculeatum, (characterized by the highest anthocyanin content and prickliness in respect to all the others) and Shum, which differed for the mean average values of 8 of 18 morphological traits analysed in a previous study [21].

PCoA including accessions of the sub-group 2 (Fig 4B), as expected grouped separately the entries of eggplant and its wild relative *S. insanum* from the close relatives *S. incanum*, *S. lichtensteinii* and *S. linnaeanum*, the latter being the most genetically differentiated from all the others. The *S. melongena* accessions analysed included types, hailing from Sri Lanka, India and China as well as from Ivory Coast and Spain and producing fruits of different shape and



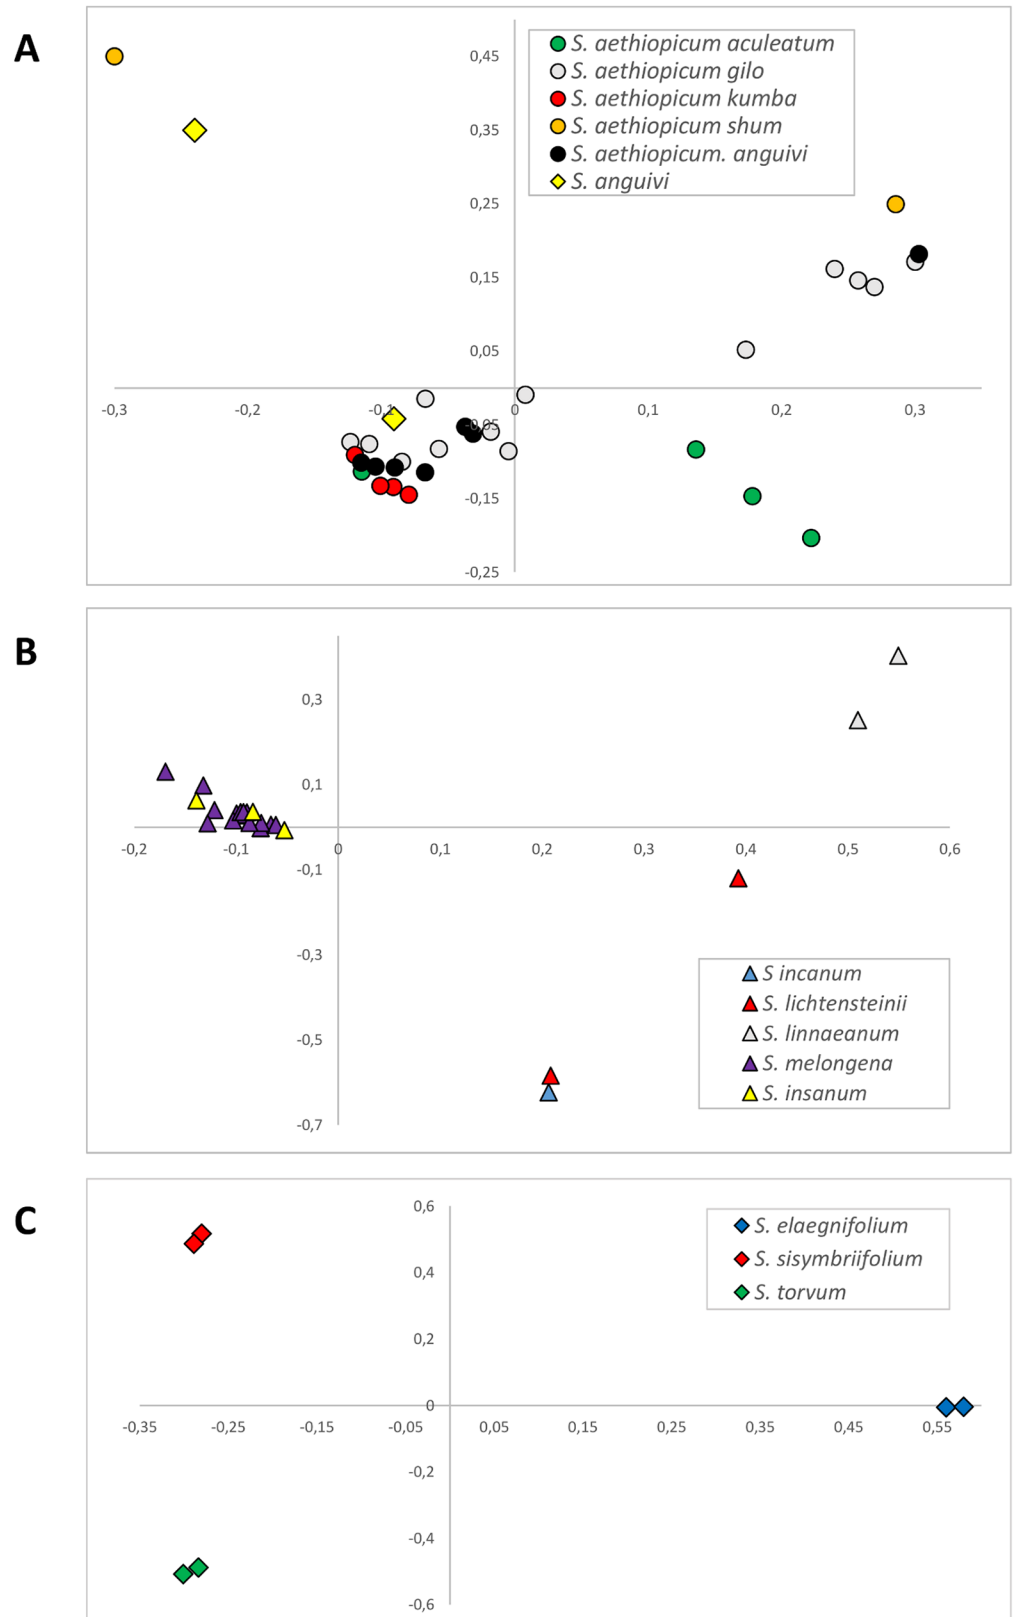

**Fig 4.** Within-groups PCoA analyses in subgroups of germplasm panel of *Solanum* accessions: visualization of the genetic relationships within sub-group 1 (A; scarlet eggplant complex), sub-group 2 (B; brinjal eggplant complex) and sub-group 4 (C; New World species).

<https://doi.org/10.1371/journal.pone.0180774.g004>

colour. In a previous work [16] 191 eggplant accessions were scored for a set of 19 fruit and plant traits and the analysis of phenotypic data made it possible to classify the genotypes in three main fruit morphological groups producing: (i) elongated fruits, (mean ratio  $fs = \text{fruit length}/\text{fruit maximum diameter}$  around 5.05); (ii) semi-long fruits ( $fs$  from 1.2 to 2) and (iii) round fruits ( $fs$  around 1), which cut across the Oriental and Occidental divide. On the other hand STRUCTURE [77] analysis based on 24 microsatellite markers (22 genomic ones and two from EST), identified two major sub-groups, which to a large extent mirrored the provenance of the entries. In the present study, in spite of the wide set of polymorphisms detected, the accessions from different origin did not highlight a grouping together trend. This apparent discrepancy can be explained by either the difference in size of the two germplasm sets, but also by the number of markers applied, as the use of a limited number of selected markers might provide unrealistic estimates of genetic variability in the set of accessions in study.

PCoA including accessions of the sub-group 4 (Fig 4C) highlights that *S. sisymbriifolium*, *S. torvum* and *S. elaeagnifolium* are genetically far away from each other and that their grouping in the sub-group 4 is due to their common high genetic divergence from all the other entries. This is confirmed by previous molecular results that includes *S. torvum* and *S. sisymbriifolium* in different clades within subgenus *Leptostemonum* from the cultivated eggplants [23,30,54,55]. Furthermore, on the basis of PCoA analysis, the two accessions of *S. torvum* form a group 'per se' in respect to all the others.

Previous phylogenetic studies placed *S. elaeagnifolium* and the rest of species of the *Elaeagnifolium* clade closer to Old World species than either *S. sisymbriifolium* or *S. torvum* [19,23,54,55,73]. Recently, crossing data confirm that *S. elaeagnifolium* is closer to eggplant than either *S. sisymbriifolium* and *S. torvum*, as interspecific hybrids have been obtained which present intermediate fertility [58], and with which it is possible to obtain backcrosses with *S. melongena* (unpublished results).

## Conclusions

One of the most exciting developments in the past decade has been the application of powerful and ultra-rapid nucleic acid sequencing techniques to the study of genetic relationships and phylogeny of crop species [78]. As previously reported by Bajaj et al. [79] in chickpea, our results demonstrate that the high-throughput genotyping of numerous genome-wide SNP markers represents a highly and more effective approach, in respect to the ones based on limited sets of genome-wide markers or a small set of gene sequences, for understanding the extent of natural allelic diversity and genetic relationships among and within wild and cultivated species belonging to eggplant complexes. The high number of detected polymorphisms were analysed by *FastSTRUCTURE* [48, 49], UPGMA and PCoA analyses and the three approaches showed to be complementary in the interpretation of data. On the whole, we confirm a wide genetic base and broad molecular diversity among wild and cultivated species within and among the three cultivated eggplant complexes and the New World eggplant CWRs. Thanks to a reduced complexity genome sequencing approach, we were able to fingerprint all accessions in the study and gathered information which may efficiently guide further exploration of the diversity and relationships in the large *Solanum* subgenus *Leptostemonum* group. The approach used and data obtained lay the foundation also to address the evaluation of gene flow among inter-fertile sympatric taxa [71], recent speciation and domestication processes of cultivated eggplants. In addition, the large number of markers distributed across the genome may also contribute to facilitate the transfer of target genomic regions controlling useful agronomic traits, such as biotic and abiotic stress tolerance or fruit quality traits, from related species into the genetic background of cultivated eggplants.

## Supporting information

**S1 Table. SNPs detected in the genome and in CDSs.** In both cases, number and percentage of: (i) missing sites; (ii) detected SNPs, the percentage is evaluated as the ratio between detected SNPs/Genomic or CDS total SNPs-missing sites; (iii) heterozygous SNPs, the percentage is evaluated as the ratio between heterozygous SNPs/ Genomic or CDS total SNPs-missing sites; (iv) homozygous SNPs, the percentage is evaluated as the ratio between homozygous SNPs/ Genomic or CDS total SNPs-missing sites.

(XLSX)

**S1 Fig. Distribution of sequenced reads, after quality cleaning and trimming procedures, across a germplasm panel of 76 *Solanum* accessions (in million reads).**

(TIFF)

**S2 Fig. *FastSTRUCTURE* output at  $K = 4$  from full germplasm panel together with outputs of separate analyses performed with subsets of taxa.** Asterisks indicate the best  $K$  choice based on the  $\Delta K$  method.

(TIF)

## Author Contributions

**Conceptualization:** Jaime Prohens, Sergio Lanteri.

**Data curation:** Alberto Acquadro, Lorenzo Barchi, Ezio Portis.

**Formal analysis:** Alberto Acquadro, Lorenzo Barchi, Pietro Gramazio, Ezio Portis, Santiago Vilanova.

**Funding acquisition:** Pietro Gramazio, Ezio Portis, Jaime Prohens, Sergio Lanteri.

**Investigation:** Lorenzo Barchi, Pietro Gramazio, Santiago Vilanova, Cinzia Comino, Mariola Plazas, Jaime Prohens.

**Methodology:** Alberto Acquadro, Pietro Gramazio, Cinzia Comino, Mariola Plazas.

**Project administration:** Sergio Lanteri.

**Supervision:** Jaime Prohens, Sergio Lanteri.

**Validation:** Alberto Acquadro, Lorenzo Barchi, Pietro Gramazio, Santiago Vilanova, Cinzia Comino, Mariola Plazas.

**Visualization:** Alberto Acquadro, Pietro Gramazio, Ezio Portis, Jaime Prohens, Sergio Lanteri.

**Writing – original draft:** Alberto Acquadro, Pietro Gramazio, Jaime Prohens, Sergio Lanteri.

**Writing – review & editing:** Alberto Acquadro, Lorenzo Barchi, Pietro Gramazio, Ezio Portis, Santiago Vilanova, Cinzia Comino, Mariola Plazas, Jaime Prohens, Sergio Lanteri.

## References

1. FAO. <http://faostat3.fao.org/home/E.org/> [Internet]. 2016.
2. Fowler C, Moore G, Hawtin G. The International Treaty on Plant Genetic Resources for Food and Agriculture: A Primer for the Future of CGIAR. SGRP (System-Wide Genetic Resources Programme) I (now BI, editor. 2003.
3. Kwon Y-I, Apostolidis E, Shetty K. In vitro studies of eggplant (*Solanum melongena*) phenolics as inhibitors of key enzymes relevant for type 2 diabetes and hypertension. *Bioresour Technol.* 2008; 99: 2981–2988. <https://doi.org/10.1016/j.biortech.2007.06.035> PMID: 17706416

4. Akanitapichat P, Phraibung K, Nuchklang K, Prompitakul S. Antioxidant and hepatoprotective activities of five eggplant varieties. *Food Chem Toxicol.* 2010; 48: 3017–3021. <http://dx.doi.org/10.1016/j.fct.2010.07.045> <https://doi.org/10.1016/j.fct.2010.07.045> PMID: 20691749
5. Stommel JR, Whitaker BD. Phenolic acid content and composition of eggplant fruit in a germplasm core subset. *J Am Soc Hortic Sci.* 2003; 128: 704–710. Available: <http://journal.ashspublications.org/content/128/5/704.abstract>
6. Mennella G, Rotino GL, Fibiani M, D'Alessandro A, Francese G, Toppino L, et al. Characterization of health-related compounds in eggplant (*Solanum melongena* L.) lines derived from introgression of allied species. *J Agric Food Chem.* 2010; 58: 7597–603. <https://doi.org/10.1021/jf101004z> PMID: 20527988
7. Harlan JR. *Crops and man.* Madison, WI: American Society of Agronomy; 1992.
8. Kashyap V, Vinod Kumar S, Collonnier C, Fusari F, Haicour R, Rotino G., et al. Biotechnology of eggplant. *Sci Hortic.* 2003; 97: 1–25. [https://doi.org/10.1016/S0304-4238\(02\)00140-1](https://doi.org/10.1016/S0304-4238(02)00140-1)
9. Fray A, Doganlar S, Daunay M-C. Eggplant. Kole C. (ed.) *Genome Mapping & Molecular Breeding in Plants, Volume V: Vegetables.* Springer Publishing, Heidelberg, Germany; 2006.
10. Daunay MC, Lester RN, Ano G. Cultivated eggplants. *Trop Plant Breed.* 2001; 200–225.
11. Plazas M, López-Gresa MP, Vilanova S, Torres C, Hurtado M, Gramazio P, et al. Diversity and relationships in key traits for functional and apparent quality in a collection of eggplant: fruit phenolics content, antioxidant activity, polyphenol oxidase activity, and browning. *J Agric Food Chem.* 2013; 61: 8871–8879. <https://doi.org/10.1021/jf402429k> PMID: 23972229
12. Zhang Y, Hu Z, Chu G, Huang C, Tian S, Zhao Z, et al. Anthocyanin accumulation and molecular analysis of anthocyanin biosynthesis-associated genes in eggplant (*Solanum melongena* L.). *J Agric Food Chem.* 2014; 62: 2906–2912. <https://doi.org/10.1021/jf404574c> PMID: 24654563
13. Docimo T, Francese G, Ruggiero A, Batelli G, De Palma M, Bassolino L, et al. Phenylpropanoids accumulation in eggplant fruit: characterization of biosynthetic genes and regulation by a MYB transcription factor. *Front Plant Sci.* 2015; 6: 1233. <https://doi.org/10.3389/fpls.2015.01233> PMID: 26858726
14. Toppino L, Barchi L, Lo Scalzo R, Palazzolo E, Francese G, Fibiani M, et al. Mapping Quantitative Trait Loci affecting biochemical and morphological fruit properties in eggplant (*Solanum melongena* L.). *Front Plant Sci.* 2016; 7: 256. <https://doi.org/10.3389/fpls.2016.00256> PMID: 26973692
15. Flint-Garcia SA. Genetics and consequences of crop domestication. *J Agric Food Chem.* 2013; 61: 8267–8276. <https://doi.org/10.1021/jf305511d> PMID: 23718780
16. Cericola F, Portis E, Toppino L, Barchi L, Acciarri N, Ciriaci T, et al. The population structure and diversity of eggplant from Asia and the Mediterranean Basin. *PLoS One.* 2013; 8: e73702. <https://doi.org/10.1371/journal.pone.0073702> PMID: 24040032
17. Rotino GL, Sala T, Toppino L. Eggplant. In: Pratap A.; Kumar J, editor. *Alien gene transfer in crop plants, volume 2: Achievements and impacts.* Springer, New York, NY, USA; 2014. pp. 381–409.
18. Knapp S, Vorontsova MS, Prohens J. Wild relatives of the eggplant (*Solanum melongena* L.: Solanaceae): new understanding of species names in a complex group. *PLOS ONE.* 2013; 8: e57039. <https://doi.org/10.1371/journal.pone.0057039> PMID: 23451138
19. Meyer RS, Karol KG, Little DP, Nee MH, Litt A. Phylogeographic relationships among Asian eggplants and new perspectives on eggplant domestication. *Mol Phylogenet Evol.* 2012; 63: 685–701. <http://dx.doi.org/10.1016/j.ympev.2012.02.006> <https://doi.org/10.1016/j.ympev.2012.02.006> PMID: 22387533
20. Daunay M., Hazra P. Eggplant. In: Peter KV, Hazra P (eds.). *Handbook of Vegetables.* Studium Pr. Houston; 2012. p. 257–322.
21. Plazas M, Andújar I, Vilanova S, Gramazio P, Herraiz FJ, Prohens J. Conventional and phenomics characterization provides insight into the diversity and relationships of hypervariable scarlet (*Solanum aethiopicum* L.) and gboma (*S. macrocarpon* L.) eggplant complexes. *Front Plant Sci.* 2014; 5: 318. <https://doi.org/10.3389/fpls.2014.00318> PMID: 25071801
22. Stern S, Agra M de F, Bohs L. Molecular delimitation of clades within New World species of the “spiny solanums” (*Solanum* subg. *Leptostemonum*). *Taxon.* 2011; 60: 1429–1441.
23. Vorontsova MS, Stern S, Bohs L, Knapp S. African spiny *Solanum* (subgenus *Leptostemonum*, Solanaceae): a thorny phylogenetic tangle. *Bot J Linn Soc.* 2013; 173: 176–193. <https://doi.org/10.1111/boj.12053>
24. Sunseri F, Polignano GB, Alba V, Lotti C, Bisignano V, Mennella G, et al. Genetic diversity and characterization of African eggplant germplasm collection. *African J Plant Sci.* 2010; 4: 231–241.
25. Schippers RR. *African indigenous vegetables: an overview of the cultivated species.* African Indig Veg an Overv Cultiv species. 2000;
26. Lester N.R., Daunay M. Diversity of African vegetable *Solanum* species and its implications for a better understanding of plant domestication. *Schriften zu Genet Ressour.* 2003; 22: 137–152.

27. Lester RN, Jaeger PML, Bleijendaal-Spierings BHM, Bleijendaal HPO, Holloway HLO. African eggplants—a review of collecting in West Africa. *Plant Genet Resour Newsl.* 1990; 17–26.
28. Liu J, Zheng Z, Zhou X, Feng C, Zhuang Y. Improving the resistance of eggplant (*Solanum melongena*) to *Verticillium* wilt using wild species *Solanum linnaeanum*. *Euphytica.* 2015; 201: 463–469. <https://doi.org/10.1007/s10681-014-1234-x>
29. Plazas M, Vilanova S, Gramazio P, Rodríguez-Burruezo A, Fita A, Herraiz FJ, et al. Interspecific hybridization between eggplant and wild relatives from different gene pools. *J Am Soc Hortic Sci. American Society for Horticultural Science;* 2016; 141: 34–44.
30. Syfert MM, Castañeda-Álvarez NP, Khoury CK, Särkinen T, Sosa CC, Achicanoy HA, et al. Crop wild relatives of the brinjal eggplant (*Solanum melongena*): Poorly represented in genebanks and many species at risk of extinction. *Am J Bot.* 2016; 103: 635–51. <https://doi.org/10.3732/ajb.1500539> PMID: 27026215
31. Varshney RK, Terauchi R, McCouch SR, Tester M, Langridge P, Varshney R, et al. Harvesting the promising fruits of genomics: applying genome sequencing technologies to crop breeding. *PLOS Biol.* 2014; 12: e1001883. <https://doi.org/10.1371/journal.pbio.1001883> PMID: 24914810
32. Mammadov J, Aggarwal R, Buyyarapu R, Kumpatla S. SNP markers and their impact on plant breeding. *Int J Plant Genomics.* 2012; 2012: 728398. <https://doi.org/10.1155/2012/728398> PMID: 23316221
33. Salas P, Prohens J, Seguí-Simarro JM. Evaluation of androgenic competence through anther culture in common eggplant and related species. *Euphytica.* 2011; 182: 261–274. <https://doi.org/10.1007/s10681-011-0490-2>
34. Lester RN, Niakan L. Origin and domestication of the scarlet eggplant, *Solanum aethiopicum*, from *S. anguivi* in Africa. In: D'Arcy WG (ed.). *Solanaceae: Biology and systematics.* Columbia University Press, New York, NY, USA.; 1986. pp. 433–456.
35. Bukenya ZR, Carasco JF. Biosystematic study of *Solanum macrocarpon*—*S. dasyphyllum* complex in Uganda and relations with *Solanum Linnaeanum*. *East African Agric For J.* 1994; 59: 187–204. <https://doi.org/10.1080/00128325.1994.11663195>
36. Ranil RHG, Prohens J, Aubriot X, Niran HML, Plazas M, Fonseka RM, et al. *Solanum insanum* L. (subgenus *Leptostemonum* Bitter, Solanaceae), the neglected wild progenitor of eggplant (*S. melongena* L.): a review of taxonomy, characteristics and uses aimed at its enhancement for improved eggplant breeding. *Genet Resour Crop Evol.* Springer Netherlands; 2017; in press. <https://doi.org/10.1007/s10722-016-0467-z>
37. Boyd JW, Murray DS, Tyril RJ. Silverleaf nightshade, *Solanum elaeagnifolium*, origin, distribution, and relation to Mmn. *Econ Bot.* 1984; 38: 210–217. Available: <http://www.jstor.org/stable/4254610>
38. Doyle JJ, Doyle JL. Isolation of plant DNA from fresh tissue. *Focus.* 1990; 12: 13–14.
39. Acquadro A, Lanteri S, Scaglione D, Arens P, Vosman B, Portis E. Genetic mapping and annotation of genomic microsatellites isolated from globe artichoke. *Theor Appl Genet.* 2009; 118: 1573–1587. <https://doi.org/10.1007/s00122-009-1005-6> PMID: 19326092
40. Peterson BK, Weber JN, Kay EH, Fisher HS, Hoekstra HE, Mackay T, et al. Double digest RADseq: an inexpensive method for de novo SNP discovery and genotyping in model and non-model species. *PLOS ONE.* 2012; 7: e37135. <https://doi.org/10.1371/journal.pone.0037135> PMID: 22675423
41. Acquadro A, Barchi L, Portis E, Carrasquilla-García N, Tirone M, Lanteri S, et al. RAD2seq: an efficient protocol for plant genotyping by sequencing. *Acta Hort.* 2016; 1147: 1–8. <https://doi.org/10.17660/ActaHortic.2016.1147.1>
42. Barchi L, Delledonne M, Lanteri S, Dal Molin A, Minio A, Ferrarini A, et al. An high quality eggplant genome sequence: a new tool for the analysis of Solanaceae family evolution and for the molecular deciphering of complex traits. 20th Eucarpia General Congress. Zurich; 2016.
43. Lanteri S, Barchi L, Toppino L, Sala T, Acquadro A, Portis E, et al. The first eggplant (*Solanum melongena* L.) high quality genome draft. *Applied Vegetable Genomics.* Wien; 2014.
44. Li H, Durbin R. Fast and accurate short read alignment with Burrows-Wheeler transform. *Bioinformatics.* 2009; 25: 1754–60. <https://doi.org/10.1093/bioinformatics/btp324> PMID: 19451168
45. Li H, Handsaker B, Wysoker A, Fennell T, Ruan J, Homer N, et al. The Sequence Alignment/Map format and SAMtools. *Bioinformatics.* 2009; 25: 2078–9. <https://doi.org/10.1093/bioinformatics/btp352> PMID: 19505943
46. Dice LR. Measures of the amount of ecological association between species. *Ecology.* 1945; 26: 297–302.
47. Hammer Ø, Harper DAT, Ryan PD. PAST—palaeontological statistics, ver. 1.89. *Palaeontol Electron.* 2001; 4.
48. Raj A, Stephens M, Pritchard JK. fastSTRUCTURE: variational inference of population structure in large SNP data sets. *Genetics.* 2014; 197.



49. Emanuelli F, Lorenzi S, Grzeskowiak L, Catalano V, Stefanini M, Troggio M, et al. Genetic diversity and population structure assessed by SSR and SNP markers in a large germplasm collection of grape. *BMC Plant Biol.* 2013; 13: 39. <https://doi.org/10.1186/1471-2229-13-39> PMID: 23497049
50. Kaeppeler SM, Kaeppeler HF, Rhee Y. Epigenetic aspects of somaclonal variation in plants. *Plant Mol Biol.* 2000; 43: 179–88. Available: <http://www.ncbi.nlm.nih.gov/pubmed/10999403> PMID: 10999403
51. Lester RN, Thitai GNW. Inheritance in *Solanum aethiopicum*, the scarlet eggplant. *Euphytica.* 1989; 40: 67–74. <https://doi.org/10.1007/BF00023299>
52. Lester RN, Hasan SMZ. Origin and domestication of the brinjal eggplant, *Solanum melongena*, from *S. incanum*, in Africa and Asia. *Solanaceae III: taxonomy, chemistry, evolution* London: The Linnean Society of London. 1991. pp. 369–387.
53. Weese TL, Bohs L. Eggplant Origins: Out of Africa, into the Orient. *Taxon.* 2010; 59: 49–56. Available: <http://www.jstor.org/stable/27757050>
54. Levin RA, Myers NR, Bohs L. Phylogenetic relationships among the “spiny solanums” (*Solanum subgenus* Leptostemonum, Solanaceae). *Am J Bot.* 2006; 93: 157–169. <https://doi.org/10.3732/ajb.93.1.157>
55. Särkinen T, Bohs L, Olmstead RG, Knapp S. A phylogenetic framework for evolutionary study of the nightshades (Solanaceae): a dated 1000-tip tree. *BMC Evol Biol.* 2013; 13: 214. <https://doi.org/10.1186/1471-2148-13-214> PMID: 24283922
56. Bletsos FA, Roupakias DG, Tsaktsira ML, Scaltsoyannes AB, Thanassouloupoulos CC. Interspecific hybrids between three eggplant (*Solanum melongena* L.) cultivars and two wild species (*Solanum torvum* Sw. and *Solanum sisymbriifolium* Lam.). *Plant Breed.* 1998; 117: 159–164. <https://doi.org/10.1111/j.1439-0523.1998.tb01471.x>
57. Kumchai J, Wei Y-C, Lee C-Y, Chen F-C, Chin S-W. Production of interspecific hybrids between commercial cultivars of the eggplant (*Solanum melongena* L.) and its wild relative *S. torvum*. *Genet Mol Res.* 2013; 12: 755–764. <https://doi.org/10.4238/2013.March.13.4> PMID: 23546959
58. Kouassi B, Prohens J, Gramazio P, Kouassi AB, Vilanova S, Galán-Ávila A, et al. Development of backcross generations and new interspecific hybrid combinations for introgression breeding in eggplant (*Solanum melongena*). *Sci Hortic.* 2016; 213: 199–207. <https://doi.org/10.1016/j.scienta.2016.10.039>
59. Gleddie S, Keller WA, Setterfield G. Production and characterization of somatic hybrids between *Solanum melongena* L. and *S. sisymbriifolium* Lam. *Theor Appl Genet.* 1986; 71: 613–621. <https://doi.org/10.1007/BF00264265> PMID: 24247537
60. Sihachakr D, Haicour R, Serraf I, Barrientos E, Herbreteau C, Ducreux G, et al. Electrofusion for the production of somatic hybrid plants of *Solanum melongena* L. and *Solanum khasianum* C.B. Clark. *Plant Sci.* 1988; 57: 215–223. [https://doi.org/10.1016/0168-9452\(88\)90127-6](https://doi.org/10.1016/0168-9452(88)90127-6)
61. Mace ES, Lester RN, Gebhardt CG. AFLP analysis of genetic relationships among the cultivated eggplant, *Solanum melongena* L., and wild relatives (Solanaceae). *Theor Appl Genet.* 1999; 99: 626–633. <https://doi.org/10.1007/s001220051277> PMID: 22665198
62. Lester RN, Jaeger PML, Child A. *Solanum in Africa*. Birmingham: Celia Lester. 2011;
63. Sakata Y, Nishio T, Matthews PJ. Chloroplast DNA analysis of eggplant (*Solanum melongena*) and related species for their taxonomic affinity. *Euphytica.* 1991; 55: 21–26. <https://doi.org/10.1007/BF00022555>
64. Isshiki S, Iwata N, Khan MMR. ISSR variations in eggplant (*Solanum melongena* L.) and related *Solanum* species. *Sci Hortic.* 2008; 117: 186–190. <https://doi.org/10.1016/j.scienta.2008.04.003>
65. Sakata Y, Lester RN. Chloroplast DNA diversity in brinjal eggplant (*Solanum melongena* L.) and related species. *Euphytica.* 1997; 97: 295–301. <https://doi.org/10.1023/A:1003000612441>
66. Furini A, Wunder J. Analysis of eggplant (*Solanum melongena*)-related germplasm: morphological and AFLP data contribute to phylogenetic interpretations and germplasm utilization. *Theor Appl Genet.* 2004; 108: 197–208. <https://doi.org/10.1007/s00122-003-1439-1> PMID: 14564389
67. Daunay MC, Lester RN, Laterrot H. The use of wild species for the genetic improvement of Brinjal eggplant (*Solanum melongena*) and tomato (*Lycopersicon esculentum*). In: Hawkes JG Nee M, Estrada N (eds). *Solanaceae III: taxonomy-chemistry-evolution*. Royal Botanical Gardens Kew, London; 1991. pp. 389–412.
68. Prohens J, Plazas M, Raigón MD, Seguí-Simarro JM, Stommel JR, Vilanova S. Characterization of interspecific hybrids and first backcross generations from crosses between two cultivated eggplants (*Solanum melongena* and *S. aethiopicum* Kumba group) and implications for eggplant breeding. *Euphytica.* 2012; 186: 517–538. <https://doi.org/10.1007/s10681-012-0652-x>
69. Khan MMR, Hasnunnahar M, Isshiki S. Production of amphidiploids of the hybrids between *Solanum macrocarpon* and eggplant. *HortScience.* 2013; 48: 422–424.
70. Lester RN, Kang J. Embryo and endosperm function and failure in *Solanum* species and hybrids. *Ann Bot.* 1998; 82: 445–453. <https://doi.org/10.1006/anbo.1998.0695>

71. Davidar P, Snow AA, Rajkumar M, Pasquet R, Daunay M-C, Mutegi E. The potential for crop to wild hybridization in eggplant (*Solanum melongena*; Solanaceae) in southern India. *Am J Bot.* 2015; 102: 129–139. <https://doi.org/10.3732/ajb.1400404> PMID: 25587155
72. Mutegi E, Snow AA, Rajkumar M, Pasquet R, Ponniah H, Daunay M-C, et al. Genetic diversity and population structure of wild/weedy eggplant (*Solanum insanum*, Solanaceae) in southern India: Implications for conservation. *Am J Bot.* 2015; 102: 140–148. <https://doi.org/10.3732/ajb.1400403> PMID: 25587156
73. Anderson GJ, Bernardello G, Bohs L, Weese T, Santos-Guerra A, Santos-Guerra A. Phylogeny and biogeography of the Canarian *Solanum vespertilio* and *S. lidii* (Solanaceae). *Anales del Jardín Botánico Madrid.* 2006; 63: 159–167. <https://doi.org/10.3989/ajbm.2006.v63.i2.5>
74. Prohens J, Anderson GJ, Herraiz FJ, Bernardello G, Santos-Guerra A, Crawford D, et al. Genetic diversity and conservation of two endangered eggplant relatives (*Solanum vespertilio* Aiton and *Solanum lidii* Sunding) endemic to the Canary Islands. *Genet Resour Crop Evol.* 2007; 54: 451–464. <https://doi.org/10.1007/s10722-006-9174-5>
75. Frary A, Frary A, Daunay M-C, Huvenaars K, Mank R, Doğanlar S. QTL hotspots in eggplant (*Solanum melongena*) detected with a high resolution map and CIM analysis. *Euphytica.* 2014; 197: 211–228. <https://doi.org/10.1007/s10681-013-1060-6>
76. Portis E, Barchi L, Toppino L, Lanteri S, Acciarri N, Felicioni N, et al. QTL mapping in eggplant reveals clusters of yield-related loci and orthology with the tomato genome. *PLOS ONE.* 2014; 9: e89499. <https://doi.org/10.1371/journal.pone.0089499> PMID: 24586828
77. Pritchard JK, Stephens M, Donnelly P. Inference of population structure using multilocus genotype data. *Genetics.* 2000; 155: 945–959. PMID: 10835412
78. Patwardhan A, Ray S, Roy A. Molecular markers in phylogenetic studies—a review. *J Phylogenetics Evol Biol.* 2014; 2: 131.
79. Bajaj D, Das S, Badoni S, Kumar V, Singh M, Bansal KC, et al. Genome-wide high-throughput SNP discovery and genotyping for understanding natural (functional) allelic diversity and domestication patterns in wild chickpea. *Sci Reports.* 2015; 5: 357–373. <https://doi.org/10.1038/srep12468> PMID: 26208313
