# Supplementary material for: Coding SNPs analysis highlights genetic relationships and evolution pattern in eggplant complexes
Source: PLoS One. 2017 Jul 7;12(7):e0180774. doi: 10.1371/journal.pone.0180774 (PMC5501601; doi:10.1371/journal.pone.0180774)
Supplement: S1 Table — In both cases, number and percentage of: (i) missing sites; (ii) detected SNPs, the percentage is evaluated as the ratio between detected SNPs/Genomic or CDS total SNPs-missing sites; (iii) heterozygous SNPs, the percentage is evaluated as the ratio between heterozygous SNPs/ Genomic or CDS total SNPs-missing sites; (iv) homozygous SNPs, the percentage is evaluated as the ratio between homoyigous SNPs/ Genomic or CDS total SNPs-missing sites. (XLSX) [file pone.0180774.s001.xlsx]

## Sheet: S1
		Total SNPs dataset				Coding SNPs
Genotype	Species	Missing sites	Detected SNPs	Heterozigous SNPs	Homozygous SNPs	Missing sites	Total SNPs	Heterozigous SNPs	Homozygous SNPs
MM457_PL2	S. aethiopicum aculeatum_1	5249 (6,96%)	16495 (23,51%)	4442 (6,33%)	12053 (17,18%)	433 (3,37%)	1616 (13,00%)	456 (3,67%)	1160 (9,34%)
UPV29803_PL3	S. aethiopicum aculeatum_2	3137 (4,16%)	16770 (23,21%)	4073 (5,64%)	12697 (17,57%)	104 (0,81%)	1619 (12,69%)	408 (3,20%)	1211 (9,49%)
RNL0187_PL4	S. aethiopicum aculeatum_3	3669 (4,87%)	16912 (23,58%)	4576 (6,38%)	12336 (17,20%)	171 (1,33%)	1625 (12,81%)	436 (3,44%)	1189 (9,37%)
MM1483_PL3	S. aethiopicum aculeatum_4	2046 (2,71%)	16973 (23,14%)	4571 (6,23%)	12402 (16,91%)	70 (0,54%)	1637 (12,80%)	464 (3,63%)	1173 (9,17%)
BBS151A_PL5	S. aethiopicum gilo_1	2821 (3,74%)	17015 (23,44%)	4362 (6,01%)	12653 (17,43%)	89 (0,69%)	1652 (12,94%)	453 (3,55%)	1199 (9,39%)
IVIA026_PL3	S. aethiopicum gilo_2	2478 (3,29%)	16678 (22,87%)	3948 (5,41%)	12730 (17,46%)	64 (0,50%)	1635 (12,78%)	441 (3,45%)	1194 (9,33%)
RARE_PLANTS_GILO_PL3	S. aethiopicum gilo_3	2670 (3,54%)	17334 (23,83%)	4891 (6,72%)	12443 (17,11%)	86 (0,67%)	1689 (13,22%)	509 (3,98%)	1180 (9,24%)
RNL0252_PL3	S. aethiopicum gilo_4	3405 (4,52%)	17344 (24,09%)	5113 (7,10%)	12231 (16,99%)	146 (1,14%)	1699 (13,36%)	530 (4,17%)	1169 (9,20%)
UPV29014_PL3	S. aethiopicum gilo_5	5987 (7,94%)	16510 (23,79%)	4523 (6,52%)	11987 (17,27%)	769 (5,98%)	1598 (13,22%)	455 (3,76%)	1143 (9,45%)
RNL0395_PL4	S. aethiopicum gilo_6	3288 (4,36%)	17155 (23,79%)	4676 (6,48%)	12479 (17,31%)	222 (1,73%)	1641 (12,99%)	461 (3,65%)	1180 (9,34%)
RNL0288_PL3	S. aethiopicum gilo_7	4440 (5,89%)	16815 (23,70%)	4828 (6,80%)	11987 (16,89%)	281 (2,19%)	1649 (13,11%)	489 (3,89%)	1160 (9,22%)
BBS181A_PL3	S. aethiopicum gilo_8	3317 (4,40%)	17004 (23,59%)	4621 (6,41%)	12383 (17,18%)	107 (0,83%)	1667 (13,07%)	475 (3,72%)	1192 (9,35%)
BBS147G	S. aethiopicum gilo_9	3389 (4,49%)	17220 (23,91%)	5044 (7,00%)	12176 (16,91%)	119 (0,93%)	1718 (13,49%)	545 (4,28%)	1173 (9,21%)
BBS140B_PL4	S. aethiopicum gilo_10	3224 (4,28%)	17143 (23,75%)	4663 (6,46%)	12480 (17,29%)	95 (0,74%)	1638 (12,83%)	441 (3,46%)	1197 (9,38%)
BBS159B_PL2	S. aethiopicum gilo_11	4219 (5,60%)	16891 (23,73%)	4816 (6,77%)	12075 (16,96%)	198 (1,54%)	1642 (12,97%)	469 (3,70%)	1173 (9,26%)
BBS142A_PL5	S. aethiopicum gilo_12	3481 (4,62%)	17194 (23,91%)	4888 (6,80%)	12306 (17,11%)	140 (1,09%)	1661 (13,06%)	487 (3,83%)	1174 (9,23%)
AN05_PL5	S. aethiopicum gilo_13	3228 (4,28%)	17117 (23,72%)	4719 (6,54%)	12398 (17,18%)	107 (0,83%)	1667 (13,07%)	466 (3,65%)	1201 (9,42%)
INRA_4_PL5	S. aethiopicum kumba_1	2325 (3,08%)	16765 (22,94%)	4132 (5,65%)	12633 (17,29%)	50 (0,39%)	1623 (12,67%)	423 (3,30%)	1200 (9,37%)
MM1207_PL3	S. aethiopicum kumba_2	2616 (3,47%)	16678 (22,91%)	3956 (5,44%)	12722 (17,48%)	70 (0,54%)	1600 (12,51%)	400 (3,13%)	1200 (9,38%)
BBS111_PL3	S. aethiopicum kumba_3	2740 (3,63%)	16648 (22,91%)	3750 (5,16%)	12898 (17,75%)	96 (0,75%)	1577 (12,36%)	377 (2,95%)	1200 (9,40%)
BBS110_PL4	S. aethiopicum kumba_4	2595 (3,44%)	17163 (23,57%)	4989 (6,85%)	12174 (16,72%)	84 (0,65%)	1648 (12,90%)	476 (3,73%)	1172 (9,17%)
RNL0022_PL13	S. aethiopicum shum_1	2292 (3,04%)	17650 (24,14%)	6480 (8,86%)	11170 (15,28%)	49 (0,38%)	1909 (14,90%)	924 (7,21%)	985 (7,69%)
RNL_0340_PL4	S. aethiopicum shum_2	2588 (3,43%)	16857 (23,15%)	4704 (6,46%)	12153 (16,69%)	101 (0,79%)	1689 (13,24%)	537 (4,21%)	1152 (9,03%)
BBS116_PL3	S. aethiopicum-anguivi_1	3000 (3,98%)	17078 (23,59%)	4471 (6,18%)	12607 (17,41%)	76 (0,59%)	1634 (12,78%)	439 (3,43%)	1195 (9,35%)
BBS192E_PL3	S. aethiopicum-anguivi_2	3653 (4,84%)	17145 (23,90%)	4933 (6,88%)	12212 (17,02%)	112 (0,87%)	1650 (12,94%)	481 (3,77%)	1169 (9,17%)
BBS148D_PL1	S. aethiopicum-anguivi_3	3134 (4,16%)	16979 (23,50%)	4388 (6,07%)	12591 (17,42%)	112 (0,87%)	1614 (12,66%)	430 (3,37%)	1184 (9,29%)
BBS131C_PL2	S. aethiopicum-anguivi_4	3141 (4,17%)	17039 (23,58%)	4486 (6,21%)	12553 (17,37%)	135 (1,05%)	1629 (12,80%)	438 (3,44%)	1191 (9,36%)
BBS184_PL5	S. aethiopicum-anguivi_5	2884 (3,82%)	17086 (23,56%)	4646 (6,41%)	12440 (17,16%)	87 (0,68%)	1677 (13,13%)	481 (3,77%)	1196 (9,36%)
BBS180A_PL4	S. aethiopicum-anguivi_6	3249 (4,31%)	17380 (24,09%)	5131 (7,11%)	12249 (16,98%)	103 (0,80%)	1677 (13,15%)	525 (4,12%)	1152 (9,03%)
BBS114_PL4	S. aethiopicum-anguivi_7	5061 (6,71%)	16596 (23,59%)	4526 (6,43%)	12070 (17,16%)	464 (3,61%)	1616 (13,04%)	457 (3,69%)	1159 (9,35%)
ANG1_1A	S. anguivi_1	737 (0,98%)	18156 (24,32%)	7956 (10,66%)	10200 (13,66%)	17 (0,13%)	1816 (14,14%)	914 (7,12%)	902 (7,02%)
ANG2_3	S. anguivi_2	1856 (2,46%)	17180 (23,36%)	4824 (6,56%)	12356 (16,80%)	60 (0,47%)	1641 (12,82%)	481 (3,76%)	1160 (9,06%)
CAM5_PL2	S. campylacanthum_1	3715 (4,93%)	14772 (20,61%)	8695 (12,13%)	6077 (8,48%)	93 (0,72%)	1829 (14,33%)	1256 (9,84%)	573 (4,49%)
CAM6_PL2	S. campylacanthum_2	6652 (8,82%)	12990 (18,90%)	6876 (10,00%)	6114 (8,89%)	249 (1,94%)	1607 (12,74%)	1054 (8,36%)	553 (4,39%)
CAM8_2	S. campylacanthum_3	5094 (6,76%)	13761 (19,57%)	7770 (11,05%)	5991 (8,52%)	132 (1,03%)	1779 (13,98%)	1253 (9,85%)	526 (4,13%)
DAS1_PL1	S. dasyphyllum_1	16157 (21,43%)	12593 (21,26%)	3753 (6,34%)	8840 (14,92%)	400 (3,11%)	1766 (14,18%)	543 (4,36%)	1223 (9,82%)
ELE1_1	S. elaeagnifolium_1	27804 (36,88%)	11236 (23,61%)	3959 (8,32%)	7277 (15,29%)	1234 (9,60%)	3451 (29,69%)	1340 (11,53%)	2111 (18,16%)
ELE2	S. elaeagnifolium_2	21276 (28,22%)	12475 (23,05%)	4258 (7,87%)	8217 (15,18%)	964 (7,50%)	3469 (29,16%)	1144 (9,62%)	2325 (19,55%)
INC_MM577	S. incanum_1	6749 (8,95%)	7394 (10,77%)	2261 (3,29%)	5133 (7,48%)	349 (2,71%)	721 (5,76%)	293 (2,34%)	428 (3,42%)
INS1_2A	S. insanum_1	3957 (5,25%)	3704 (5,18%)	1608 (2,25%)	2096 (2,93%)	296 (2,30%)	437 (3,48%)	239 (1,90%)	198 (1,58%)
INS2_1	S. insanum_2	2990 (3,97%)	3179 (4,39%)	2183 (3,01%)	996 (1,38%)	195 (1,52%)	341 (2,69%)	227 (1,79%)	114 (0,90%)
INS3_1	S. insanum_3	3507 (4,65%)	3362 (4,68%)	2516 (3,50%)	846 (1,18%)	253 (1,97%)	507 (4,02%)	404 (3,21%)	103 (0,82%)
LIC1_1A	S. lichtensteinii_1	9030 (11,98%)	8597 (12,95%)	2352 (3,54%)	6245 (9,41%)	528 (4,11%)	845 (6,85%)	307 (2,49%)	538 (4,36%)
LIC2_3	S. lichtensteinii_2	6246 (8,28%)	7346 (10,62%)	1630 (2,36%)	5716 (8,27%)	425 (3,31%)	658 (5,29%)	181 (1,46%)	477 (3,84%)
LID1	S. lidii_1	11145 (14,78%)	11664 (18,15%)	2631 (4,09%)	9033 (14,06%)	551 (4,28%)	1448 (11,76%)	277 (2,25%)	1171 (9,51%)
LID2	S. lidii_2	10086 (13,38%)	12720 (19,48%)	4284 (6,56%)	8436 (12,92%)	413 (3,21%)	1625 (13,06%)	554 (4,45%)	1071 (8,61%)
LIN1_1	S. linnaeanum_1	8303 (11,01%)	8286 (12,35%)	2255 (3,36%)	6031 (8,99%)	423 (3,29%)	939 (7,55%)	388 (3,12%)	551 (4,43%)
LIN3	S. linnaeanum_2	5627 (7,46%)	8425 (12,08%)	1812 (2,60%)	6613 (9,48%)	312 (2,43%)	796 (6,34%)	177 (1,41%)	619 (4,93%)
MM1558_PL5	S. macrocarpon_1	17925 (23,77%)	11950 (20,79%)	2595 (4,52%)	9355 (16,28%)	476 (3,70%)	1667 (13,46%)	314 (2,54%)	1353 (10,93%)
BBS168_PL3	S. macrocarpon_2	16373 (21,72%)	12256 (20,76%)	3155 (5,35%)	9101 (15,42%)	478 (3,72%)	1692 (13,67%)	389 (3,14%)	1303 (10,52%)
BBS117_PL1	S. macrocarpon_3	14880 (19,74%)	13555 (22,40%)	5768 (9,53%)	7787 (12,87%)	459 (3,57%)	2020 (16,29%)	997 (8,04%)	1023 (8,25%)
BBS171B_PL3	S. macrocarpon_4	10275 (13,63%)	14816 (22,75%)	5611 (8,62%)	9205 (14,13%)	272 (2,12%)	1806 (14,35%)	682 (5,42%)	1124 (8,93%)
BBS178_PL1	S. macrocarpon_5	11985 (15,90%)	12749 (20,10%)	5819 (9,18%)	6930 (10,93%)	310 (2,41%)	1743 (13,89%)	787 (6,27%)	956 (7,62%)
MEL1_2	S. melongena_1	3422 (4,54%)	2515 (3,49%)	1836 (2,55%)	679 (0,94%)	266 (2,07%)	414 (3,29%)	315 (2,50%)	99 (0,79%)
MEL1_3	S. melongena_2	2449 (3,25%)	5176 (7,10%)	4176 (5,72%)	1000 (1,37%)	204 (1,59%)	728 (5,75%)	615 (4,86%)	113 (0,89%)
MEL2_2A	S. melongena_3	3254 (4,32%)	2891 (4,01%)	2162 (3,00%)	729 (1,01%)	197 (1,53%)	607 (4,79%)	515 (4,07%)	92 (0,73%)
MEL3_PL3	S. melongena_4	2882 (3,82%)	2264 (3,12%)	1516 (2,09%)	748 (1,03%)	212 (1,65%)	336 (2,66%)	242 (1,91%)	94 (0,74%)
MEL4_PL2A	S. melongena_5	2549 (3,38%)	2262 (3,11%)	1537 (2,11%)	725 (1,00%)	221 (1,72%)	326 (2,58%)	226 (1,79%)	100 (0,79%)
MEL5_PL2	S. melongena_6	2226 (2,95%)	2257 (3,08%)	1253 (1,71%)	1004 (1,37%)	213 (1,66%)	355 (2,81%)	249 (1,97%)	106 (0,84%)
MEL5_PL5	S. melongena_7	2902 (3,85%)	1427 (1,97%)	597 (0,82%)	830 (1,14%)	251 (1,95%)	190 (1,51%)	111 (0,88%)	79 (0,63%)
MEL6_PL3	S. melongena_8	2124 (2,82%)	2386 (3,26%)	1643 (2,24%)	743 (1,01%)	164 (1,28%)	315 (2,48%)	218 (1,72%)	97 (0,76%)
AN-S-26	S. melongena_9	4913 (6,52%)	1061 (1,51%)	582 (0,83%)	479 (0,68%)	454 (3,53%)	202 (1,63%)	131 (1,06%)	71 (0,57%)
DH_AN-S-26	S. melongena_10	3799 (5,04%)	931 (1,30%)	385 (0,54%)	546 (0,76%)	329 (2,56%)	160 (1,28%)	84 (0,67%)	76 (0,61%)
MM1597_PL1	S. melongena_11	3338 (4,43%)	915 (1,27%)	322 (0,45%)	593 (0,82%)	328 (2,55%)	106 (0,85%)	34 (0,27%)	72 (0,57%)
DH_ECAVI_PL1	S. melongena_12	3685 (4,89%)	785 (1,09%)	254 (0,35%)	531 (0,74%)	361 (2,81%)	98 (0,78%)	38 (0,30%)	60 (0,48%)
H15_PL2	S. melongena_13	4711 (6,25%)	1154 (1,63%)	658 (0,93%)	496 (0,70%)	446 (3,47%)	190 (1,53%)	117 (0,94%)	73 (0,59%)
A0413_PL1	S. melongena_14	7443 (9,87%)	1279 (1,88%)	985 (1,45%)	294 (0,43%)	871 (6,77%)	234 (1,95%)	190 (1,59%)	44 (0,37%)
ASI-S-1_PL1	S. melongena_15	5591 (7,42%)	1140 (1,63%)	898 (1,29%)	242 (0,35%)	531 (4,13%)	220 (1,78%)	179 (1,45%)	41 (0,33%)
IVIA371_PL1	S. melongena_16	3580 (4,75%)	929 (1,29%)	334 (0,47%)	595 (0,83%)	305 (2,37%)	136 (1,08%)	53 (0,42%)	83 (0,66%)
SIS1_PL1	S. sisymbriifolium_1	41041 (54,43%)	6892 (20,06%)	2013 (5,86%)	4879 (14,20%)	2301 (17,89%)	3073 (29,11%)	921 (8,72%)	2152 (20,38%)
SIS2_PL2	S. sisymbriifolium_2	36780 (48,78%)	6357 (16,46%)	2803 (7,26%)	3554 (9,20%)	2676 (20,81%)	2781 (27,32%)	1282 (12,59%)	1499 (14,72%)
TOM1	S. tomentosum_1	15006 (19,90%)	10657 (17,65%)	2423 (4,01%)	8234 (13,63%)	513 (3,99%)	1485 (12,03%)	335 (2,71%)	1150 (9,32%)
TOR2_1	S. torvum_1	40646 (53,91%)	7445 (21,42%)	1890 (5,44%)	5555 (15,98%)	2186 (17,00%)	3048 (28,56%)	566 (5,30%)	2482 (23,25%)
TOR3_2	S. torvum_2	41096 (54,50%)	7976 (23,25%)	1731 (5,05%)	6245 (18,21%)	2284 (17,76%)	3118 (29,48%)	460 (4,35%)	2658 (25,13%)
VES2_PL1	S. vespertilio_1	11373 (15,08%)	11341 (17,71%)	2861 (4,47%)	8480 (13,24%)	503 (3,91%)	1473 (11,92%)	316 (2,56%)	1157 (9,36%)
VIO1_2	S. violaceum_1	7601 (10,08%)	13377 (19,73%)	7308 (10,78%)	6069 (8,95%)	260 (2,02%)	1802 (14,30%)	1076 (8,54%)	726 (5,76%)
